# Supplementary material for: Research into the characteristic molecules significantly affecting liver cancer immunotherapy
Source: Front Immunol. 2023 Feb 13;14:1029427. doi: 10.3389/fimmu.2023.1029427 (PMC9968832; doi:10.3389/fimmu.2023.1029427)
Supplement: Supplementary file 6 [file Table_1.xlsx]

## Sheet: TCGA
Id	futime	fustat	age	gender	grade	stage	T	M	N
TCGA-DD-A1EA	2415	0	68	MALE	G2	Stage II	T2	M0	N0
TCGA-KR-A7K0	65	1	65	MALE	G1	Stage I	T1	M0	N0
TCGA-DD-A4NS	2456	1	61	FEMALE	G2	Stage I	T1	M0	N0
TCGA-CC-A5UC	347	1	63	MALE	G3	Stage IIIA	T3	M0	N0
TCGA-G3-AAV7	361	0	38	MALE	G2	Stage II	T2	M0	N0
TCGA-DD-AAED	763	0	51	MALE	G3	Stage I	T1	M0	N0
TCGA-DD-AAE0	555	0	45	FEMALE	G4	Stage IIIA	T3a	M0	N0
TCGA-CC-A3M9	300	1	45	MALE	G3	Stage IIIA	T3	M0	N0
TCGA-DD-A3A4	612	1	37	MALE	G3	Stage IIIA	T3	M0	N0
TCGA-DD-AADB	1242	0	51	MALE	G4	Stage I	T1	M0	N0
TCGA-G3-A25V	860	0	68	MALE	G2	Stage I	T1	M0	N0
TCGA-DD-AAE7	644	0	72	MALE	G2	Stage I	T1	M0	N0
TCGA-LG-A9QC	425	0	48	MALE	G2	Stage I	T1	M0	NX
TCGA-DD-AAEH	784	0	73	MALE	G2	Stage I	T1	M0	N0
TCGA-DD-AAW1	1989	0	55	MALE	G2	Stage IIIA	T3	M0	N0
TCGA-2Y-A9H9	697	0	70	MALE	G2	Stage I	T1	MX	N0
TCGA-5C-AAPD	20	0	61	MALE	G1	Stage II	T2	M0	N0
TCGA-EP-A2KA	627	1	52	FEMALE	G3	Stage IIIA	T3a	MX	NX
TCGA-DD-A73B	283	1	72	FEMALE	G2	Stage I	T1	M0	N0
TCGA-UB-A7MD	52	1	67	MALE	G3	Stage I	T1	MX	N0
TCGA-DD-A113	2425	0	55	FEMALE	G3	Stage II	T2	M0	N0
TCGA-5C-A9VH	322	0	70	MALE	G2	Stage I	T1	M0	N0
TCGA-ED-A5KG	854	0	60	FEMALE	G2	Stage II	T2	M0	N0
TCGA-BC-A10U	837	1	69	MALE	G2	unknow	T2	MX	NX
TCGA-DD-A39V	643	1	77	MALE	G3	Stage II	T2	M0	NX
TCGA-ED-A627	423	0	74	MALE	G2	Stage I	T1	M0	NX
TCGA-G3-AAV2	372	0	50	MALE	G1	Stage I	T1	M0	N0
TCGA-ZS-A9CD	1386	1	73	MALE	G2	Stage II	T2	MX	NX
TCGA-GJ-A9DB	67	1	68	MALE	G2	Stage I	T1	MX	N0
TCGA-G3-AAV4	27	1	83	FEMALE	G1	Stage I	T1	M0	N0
TCGA-DD-AADP	458	0	45	MALE	G3	Stage I	T1	M0	N0
TCGA-DD-A4NL	1711	0	46	MALE	G1	Stage I	T1	M0	N0
TCGA-CC-5261	97	1	44	MALE	G2	Stage II	T2	M0	N0
TCGA-UB-A7MC	500	0	59	MALE	G3	Stage IIIA	T3a	MX	N0
TCGA-CC-A7IF	649	1	59	MALE	G1	Stage IIIA	T3	M0	N0
TCGA-4R-AA8I	262	1	66	MALE	G2	Stage II	T2	MX	NX
TCGA-DD-A73C	701	0	65	FEMALE	G1	Stage IIIA	T3a	M0	N0
TCGA-CC-5259	250	0	60	FEMALE	G2	Stage IIIC	T4	M0	N0
TCGA-2Y-A9GW	1271	1	64	MALE	G2	Stage I	T1	MX	N0
TCGA-BC-A10S	1423	1	81	MALE	G1	unknow	T3	MX	NX
TCGA-UB-A7ME	486	0	51	MALE	G2	Stage I	T1	MX	NX
TCGA-ED-A97K	6	0	54	MALE	G2	Stage IIIA	T3a	M0	N0
TCGA-XR-A8TF	693	1	74	MALE	G1	Stage I	T1	MX	NX
TCGA-CC-A7II	399	0	54	MALE	G3	Stage IIIA	T3	M0	N0
TCGA-DD-AADQ	436	0	59	MALE	G3	Stage II	T2	M0	N0
TCGA-K7-A6G5	512	0	66	MALE	G2	Stage I	T1	MX	N0
TCGA-CC-5264	102	1	71	MALE	G2	Stage IIIA	T3	M0	N0
TCGA-DD-A39Y	171	1	67	MALE	G3	Stage I	T1	M0	NX
TCGA-ED-A8O6	56	1	50	FEMALE	G3	Stage IIIA	T3a	M0	N0
TCGA-DD-A1E9	2759	1	70	MALE	G2	Stage I	T1	M0	N0
TCGA-DD-A1EC	602	0	20	FEMALE	G3	Stage I	T1	M0	N0
TCGA-DD-A115	2542	1	53	MALE	G2	Stage IIIA	T3	M0	N0
TCGA-HP-A5MZ	91	1	78	MALE	G2	Stage I	T1	M0	NX
TCGA-DD-A1EK	558	1	64	FEMALE	G2	Stage IVB	T4	M1	N0
TCGA-DD-AAE2	638	0	51	MALE	G3	Stage I	T1	M0	N0
TCGA-CC-A5UE	272	1	48	MALE	G2	Stage IIIB	T4	M0	N0
TCGA-NI-A8LF	799	0	74	MALE	G3	Stage I	T1	MX	NX
TCGA-BW-A5NO	20	0	50	MALE	G2	Stage IIIA	T3a	MX	NX
TCGA-CC-A5UD	304	1	45	MALE	G2	Stage IIIA	T3	M0	N0
TCGA-DD-A1EF	394	1	57	FEMALE	G3	Stage I	T1	M0	N0
TCGA-GJ-A3OU	879	0	59	MALE	G2	Stage I	T1	MX	NX
TCGA-DD-AAVU	2202	0	46	MALE	G2	Stage II	T2	M0	N0
TCGA-G3-A6UC	671	0	65	MALE	G2	Stage IIIB	T3b	M0	N0
TCGA-CC-A9FU	0	0	52	FEMALE	G2	Stage IIIA	T3a	M0	N0
TCGA-DD-AAD3	1295	0	43	MALE	G2	Stage I	T1	M0	N0
TCGA-2Y-A9GU	1939	0	55	FEMALE	G2	Stage I	T1	MX	NX
TCGA-MI-A75G	698	0	63	MALE	G2	Stage II	T2	M0	N0
TCGA-FV-A4ZP	2486	1	78	MALE	G2	Stage IIIA	T3	M0	NX
TCGA-PD-A5DF	639	1	58	FEMALE	G2	Stage IIIB	T4	M0	N0
TCGA-DD-A3A9	931	1	64	FEMALE	G2	Stage IVB	T4	M1	N0
TCGA-DD-AACA	2301	0	65	MALE	G3	Stage I	T1	M0	N0
TCGA-DD-AAW2	1855	0	69	MALE	G2	Stage I	T1	M0	N0
TCGA-DD-AADD	1231	0	51	MALE	G4	Stage I	T1	M0	N0
TCGA-XR-A8TG	898	0	58	MALE	G2	Stage I	T1	M0	NX
TCGA-UB-AA0V	314	0	69	FEMALE	G1	Stage I	unknow	MX	NX
TCGA-CC-A7IE	217	1	57	MALE	G2	Stage IIIA	T3	M0	N0
TCGA-BC-A69I	387	0	69	MALE	G1	Stage I	T1	M0	N0
TCGA-DD-AAE3	566	0	50	MALE	G2	Stage I	T1	M0	N0
TCGA-CC-A1HT	101	1	50	MALE	G3	Stage IIIA	T3	M0	N0
TCGA-ZP-A9D1	21	0	56	FEMALE	G2	unknow	T1	MX	NX
TCGA-EP-A3JL	303	0	76	MALE	G2	Stage I	T1	MX	NX
TCGA-CC-A7IL	278	1	61	MALE	G1	Stage IIIA	T3	M0	N0
TCGA-CC-5263	129	1	35	MALE	G1	Stage IIIA	T3	M0	N0
TCGA-G3-A25X	1779	0	73	MALE	G3	Stage II	T2	M0	N0
TCGA-WQ-A9G7	30	0	71	FEMALE	G3	unknow	T3a	M0	NX
TCGA-G3-A25Z	655	0	58	MALE	G2	Stage I	T1	M0	N0
TCGA-DD-AACX	170	0	66	MALE	G3	Stage II	T2	M0	N0
TCGA-DD-AAE6	141	0	59	FEMALE	G2	Stage I	T1	M0	N0
TCGA-UB-AA0U	327	0	60	MALE	G2	Stage II	T2	MX	NX
TCGA-RG-A7D4	1098	0	69	MALE	G2	Stage II	T2	M0	N0
TCGA-MI-A75I	630	0	61	MALE	G1	unknow	T2	MX	NX
TCGA-DD-AAVX	1718	0	38	MALE	G2	Stage II	T2	M0	N0
TCGA-EP-A2KC	19	1	62	MALE	G3	Stage I	T1	MX	NX
TCGA-DD-AADN	898	0	59	MALE	G4	Stage I	T1	MX	NX
TCGA-DD-A4NV	2398	0	61	MALE	G1	Stage IIIA	T3	M0	N0
TCGA-T1-A6J8	23	0	68	MALE	G2	unknow	T1	M0	NX
TCGA-DD-A4NK	1210	1	80	FEMALE	G2	Stage IIIA	T3	M0	N0
TCGA-CC-A7IJ	382	0	56	MALE	G3	Stage II	T2	M0	N0
TCGA-DD-AADR	2028	0	58	MALE	G3	Stage I	T1	M0	N0
TCGA-DD-A4NH	917	0	65	FEMALE	G3	Stage IIIB	T3b	M0	N0
TCGA-BD-A2L6	1363	0	69	MALE	G2	unknow	T2	MX	NX
TCGA-G3-A3CG	673	0	80	MALE	G2	Stage I	T1	M0	N0
TCGA-RC-A6M3	0	0	24	MALE	G3	Stage II	T2	M0	N0
TCGA-DD-AACB	2324	0	74	FEMALE	G3	Stage I	T1	M0	N0
TCGA-BC-A10Y	711	1	76	MALE	G3	unknow	T4	MX	NX
TCGA-CC-A9FW	248	0	68	MALE	G2	Stage IIIA	T3	M0	N0
TCGA-DD-A1EL	415	1	23	MALE	G3	Stage II	T2	M0	N0
TCGA-DD-AAEE	810	0	55	MALE	G4	Stage I	T1	M0	N0
TCGA-BC-A10W	91	1	50	MALE	G3	unknow	T4	MX	NX
TCGA-CC-A8HU	344	1	39	FEMALE	G3	Stage IIIA	T3	M0	N0
TCGA-RC-A7SK	472	0	59	MALE	G3	Stage I	T1	M0	N0
TCGA-CC-5258	129	1	48	MALE	G2	Stage II	T2	M0	N0
TCGA-UB-A7MF	214	1	56	MALE	G2	Stage IIIA	T3a	MX	NX
TCGA-DD-AACL	107	1	66	FEMALE	G3	Stage I	T1	M0	N0
TCGA-BC-A10T	837	1	76	MALE	G1	unknow	T4	MX	NX
TCGA-DD-AACE	2184	0	62	MALE	G3	Stage I	T1	M0	N0
TCGA-BC-A110	2116	1	51	FEMALE	G1	unknow	T1	MX	NX
TCGA-ED-A7PY	390	0	20	FEMALE	G3	Stage II	T2	M0	NX
TCGA-DD-A4NR	9	1	85	FEMALE	G3	Stage I	T1	M0	N0
TCGA-BC-A8YO	562	0	66	FEMALE	G3	Stage IIIC	T4	M0	N0
TCGA-DD-AADU	554	0	60	MALE	G3	Stage II	T2	M0	N0
TCGA-BC-A10Z	34	1	62	FEMALE	G2	Stage I	T1	MX	N0
TCGA-DD-AACK	9	0	70	MALE	G2	Stage I	T1	M0	N0
TCGA-DD-AAEK	1067	0	51	MALE	G3	Stage II	T2	M0	N0
TCGA-DD-AAW3	1633	0	69	MALE	G2	Stage I	T1	M0	N0
TCGA-2Y-A9GZ	848	1	82	FEMALE	G2	Stage II	T2	MX	NX
TCGA-DD-A73F	1085	0	77	FEMALE	G1	Stage I	T1	M0	N0
TCGA-DD-AACS	1804	0	39	MALE	G3	Stage I	T1	M0	N0
TCGA-ED-A66Y	296	1	51	FEMALE	G3	Stage IIIA	T3a	M0	N0
TCGA-G3-A3CJ	594	0	52	MALE	G2	Stage II	T2	M0	N0
TCGA-2Y-A9H2	1731	0	64	FEMALE	G3	Stage I	T1	MX	N0
TCGA-ED-A7PZ	6	0	61	MALE	G2	Stage II	T2	M0	NX
TCGA-DD-AACI	1618	0	69	MALE	G3	Stage II	T2	M0	N0
TCGA-DD-A116	1622	1	68	MALE	G3	Stage IIIA	T3	M0	N0
TCGA-DD-AAEG	719	0	59	FEMALE	G3	Stage I	T1	M0	N0
TCGA-DD-A114	1149	1	42	MALE	G3	Stage II	T2	M0	unknow
TCGA-ZS-A9CF	2412	0	64	MALE	G2	Stage II	T2	MX	NX
TCGA-RC-A6M6	9	0	75	MALE	G3	Stage II	T2	M0	NX
TCGA-5R-AA1C	520	0	57	MALE	G2	Stage II	T2	M0	N0
TCGA-CC-5262	103	1	67	MALE	G1	Stage IIIC	T4	M0	N0
TCGA-DD-AACO	1876	0	40	MALE	G3	Stage I	T1	M0	N0
TCGA-ZP-A9CY	782	0	66	FEMALE	G1	unknow	T1	MX	NX
TCGA-ZP-A9D4	395	0	64	FEMALE	G1	unknow	T1	MX	NX
TCGA-ZS-A9CE	1241	0	79	FEMALE	G1	Stage II	T2	MX	NX
TCGA-DD-AAVS	1823	0	56	MALE	G2	Stage I	T1	M0	N0
TCGA-XR-A8TC	1339	0	43	FEMALE	G2	Stage I	T1	MX	NX
TCGA-DD-A39W	827	1	29	FEMALE	G2	Stage III	T3	M0	N0
TCGA-BC-A69H	444	0	64	MALE	G3	Stage II	T2	M0	NX
TCGA-DD-A4NA	1008	0	67	FEMALE	G3	Stage IIIC	T2	M0	N1
TCGA-MI-A75E	507	0	61	MALE	G2	Stage IIIC	T4	M0	N0
TCGA-DD-AAVZ	1900	0	38	MALE	G2	Stage I	T1	M0	N0
TCGA-G3-A5SL	621	0	70	MALE	G2	Stage II	T2	M0	NX
TCGA-ED-A7XP	400	0	53	FEMALE	G3	Stage II	T2	M0	N0
TCGA-EP-A2KB	596	1	46	FEMALE	G2	Stage I	T1	MX	NX
TCGA-DD-A4NI	816	0	67	MALE	G2	Stage II	T2	M0	NX
TCGA-CC-A9FV	0	0	57	MALE	G2	Stage IIIA	T3	M0	N0
TCGA-WQ-AB4B	395	0	62	MALE	G2	Stage II	T2	M0	NX
TCGA-G3-AAV1	359	1	51	MALE	G3	Stage IIIC	T4	M0	N0
TCGA-CC-A3MC	363	0	54	MALE	G2	Stage IIIA	T3	M0	N0
TCGA-G3-AAUZ	480	0	48	MALE	G2	Stage I	T1	M0	N0
TCGA-DD-AACM	1769	0	48	MALE	G3	Stage II	T2	M0	N0
TCGA-DD-A11D	1560	1	57	FEMALE	G2	Stage I	T1	M0	N0
TCGA-DD-AACF	365	1	68	MALE	G3	Stage I	T1	M0	N0
TCGA-BD-A3EP	409	0	75	FEMALE	G2	Stage I	T1	M0	N0
TCGA-ED-A4XI	819	0	58	MALE	G3	Stage II	T2	M0	N0
TCGA-DD-A11A	79	0	67	MALE	G3	Stage I	T1	M0	N0
TCGA-QA-A7B7	94	0	48	MALE	G2	Stage II	T2	MX	NX
TCGA-DD-AADL	636	0	58	MALE	G4	Stage I	T1	M0	N0
TCGA-2Y-A9H6	357	0	68	FEMALE	G2	Stage I	T1	MX	NX
TCGA-2Y-A9GY	757	1	64	FEMALE	G3	Stage II	T2	MX	NX
TCGA-DD-A73E	44	0	66	MALE	G1	Stage I	T1	M0	N0
TCGA-RC-A7SF	579	0	66	MALE	G2	Stage I	T1	M0	N0
TCGA-BC-A3KG	680	0	68	FEMALE	G3	Stage II	T2	M0	N0
TCGA-DD-AAVP	2752	0	48	MALE	G1	Stage I	T1	M0	N0
TCGA-ED-A459	910	0	47	MALE	G2	Stage II	T2	M0	N0
TCGA-DD-AACW	1424	0	43	MALE	G3	Stage I	T1	M0	N0
TCGA-3K-AAZ8	396	0	65	MALE	G1	Stage IIIB	T3b	MX	NX
TCGA-G3-A7M5	447	0	76	MALE	G2	Stage I	T1	MX	NX
TCGA-FV-A3R2	194	1	75	MALE	unknow	Stage I	T1	MX	NX
TCGA-BD-A3ER	1115	0	62	MALE	G2	Stage II	T2	MX	NX
TCGA-DD-AADY	555	0	55	FEMALE	G2	Stage I	T1	M0	N0
TCGA-DD-AACY	1450	0	61	MALE	G3	Stage I	T1	M0	N0
TCGA-DD-A1EI	183	0	46	MALE	G2	Stage I	T1	M0	N0
TCGA-2Y-A9HB	260	0	66	MALE	G2	Stage I	T1	MX	NX
TCGA-CC-A123	219	0	24	FEMALE	G1	Stage IIIA	T3	M0	N0
TCGA-XR-A8TE	925	0	16	MALE	G1	Stage IIIA	T3	MX	N0
TCGA-CC-A8HT	140	1	74	MALE	G2	Stage IIIA	T3	M0	N0
TCGA-G3-A5SM	520	0	58	MALE	G3	Stage II	T2	M0	NX
TCGA-ES-A2HS	688	1	80	MALE	G2	Stage I	T1	MX	NX
TCGA-FV-A2QQ	729	0	80	MALE	G2	Stage I	T1	MX	N0
TCGA-DD-AACU	1567	0	59	MALE	G3	Stage I	T1	M0	N0
TCGA-RC-A7SH	468	0	42	MALE	G3	Stage II	T2	M0	N0
TCGA-ZP-A9D2	765	1	51	MALE	G2	unknow	T2	MX	NX
TCGA-DD-AACT	1562	0	69	FEMALE	G2	Stage I	T1	M0	N0
TCGA-DD-AADG	1145	0	70	MALE	G3	Stage IIIA	T3a	M0	N0
TCGA-2Y-A9H0	3675	0	49	MALE	G1	Stage IIIA	T3	M0	N0
TCGA-G3-AAV6	65	1	53	FEMALE	G3	Stage IIIA	T3a	M0	N0
TCGA-DD-A73D	693	0	68	FEMALE	G1	Stage II	T2	MX	NX
TCGA-FV-A2QR	581	1	75	MALE	G1	Stage I	T1	M0	N0
TCGA-DD-AADK	1049	0	68	FEMALE	G3	Stage II	T2	M0	N0
TCGA-DD-A4NE	660	1	75	FEMALE	G3	Stage IIIA	T3a	M0	N0
TCGA-CC-A7IG	299	1	47	MALE	G2	Stage II	T2	M0	N0
TCGA-DD-A1EB	2017	0	72	FEMALE	G2	Stage I	T1	M0	N0
TCGA-DD-A118	3437	0	77	FEMALE	G2	Stage II	T2	M0	N0
TCGA-5R-AAAM	46	1	65	FEMALE	G2	Stage II	T2	M0	N0
TCGA-DD-AAVQ	2728	0	38	MALE	G2	Stage I	T1	M0	N0
TCGA-G3-A25U	1636	0	63	FEMALE	G3	Stage I	T1	M0	N0
TCGA-G3-A7M8	430	0	31	MALE	G1	Stage I	T1	MX	NX
TCGA-DD-A3A5	3125	1	66	FEMALE	G2	Stage III	T3	M0	N0
TCGA-DD-AACZ	171	1	63	FEMALE	G4	Stage I	T1	M0	N0
TCGA-BC-A217	1397	1	75	FEMALE	G3	Stage II	T2	M0	NX
TCGA-ED-A7XO	427	0	29	MALE	G2	Stage IIIA	T3a	M0	N0
TCGA-FV-A495	1	0	51	FEMALE	G2	Stage II	T2	M0	NX
TCGA-DD-A1EH	1495	0	23	MALE	G3	Stage III	T3	M0	N0
TCGA-FV-A23B	1852	1	70	FEMALE	unknow	Stage II	T2	M0	N0
TCGA-MI-A75C	291	0	64	MALE	G3	Stage I	T1	M0	N0
TCGA-DD-A4NP	3308	0	32	MALE	G3	Stage I	T1	M0	N0
TCGA-DD-AADF	115	1	64	FEMALE	G4	Stage I	T1	M0	N0
TCGA-DD-AAEA	575	0	65	MALE	G3	Stage I	T1	M0	N0
TCGA-EP-A3RK	363	0	73	MALE	G2	Stage IIIA	T3a	MX	NX
TCGA-BC-4072	1490	1	74	FEMALE	G3	Stage IIIA	T3	M0	N0
TCGA-FV-A3I0	848	0	76	FEMALE	G2	Stage II	T2	M0	NX
TCGA-UB-A7MB	601	0	24	MALE	G3	Stage II	T2	MX	NX
TCGA-ZP-A9CZ	706	0	72	MALE	G1	unknow	T1	MX	NX
TCGA-MI-A75H	747	0	77	MALE	unknow	unknow	unknow	MX	NX
TCGA-G3-A5SJ	698	0	59	MALE	G2	Stage I	T1	M0	NX
TCGA-DD-AAD0	137	0	73	FEMALE	G2	Stage I	T1	M0	N0
TCGA-ED-A82E	408	0	60	FEMALE	G2	Stage IIIA	T3a	M0	N0
TCGA-BC-A5W4	547	1	69	MALE	G3	Stage IIIA	T3a	M0	NX
TCGA-DD-AAEI	1531	0	72	MALE	G2	Stage I	T1	M0	N0
TCGA-2Y-A9GT	1624	1	51	MALE	G2	Stage I	T1	MX	NX
TCGA-XR-A8TD	1030	0	49	FEMALE	G3	Stage IIIB	T3	M0	N0
TCGA-2Y-A9H4	1452	0	68	MALE	G2	Stage I	T1	MX	N0
TCGA-DD-AACD	381	1	48	MALE	G4	Stage I	T1	M0	N0
TCGA-BC-A112	153	1	80	MALE	G2	unknow	T3	MX	NX
TCGA-2Y-A9GV	2532	1	54	FEMALE	G1	Stage I	T1	MX	NX
TCGA-DD-AADJ	1066	0	70	FEMALE	G3	Stage I	T1	M0	N0
TCGA-CC-5260	87	1	61	FEMALE	G1	Stage IIIC	T4	M0	N0
TCGA-LG-A6GG	387	0	79	FEMALE	G2	Stage II	T2	M0	NX
TCGA-G3-AAV0	476	0	58	MALE	G2	Stage I	T1	M0	N0
TCGA-DD-AACQ	432	1	50	MALE	G3	Stage II	T2	M0	N0
TCGA-KR-A7K7	951	0	61	FEMALE	G1	Stage II	T2	M0	N0
TCGA-DD-A4NJ	928	0	54	FEMALE	G2	Stage II	T2	M0	N0
TCGA-DD-AAVV	2455	0	56	MALE	G3	Stage II	T2	M0	N0
TCGA-DD-AAC8	16	1	72	MALE	G3	Stage I	T1	M0	N0
TCGA-G3-A25W	935	0	79	FEMALE	G2	Stage IIIB	T3b	M0	N0
TCGA-WJ-A86L	345	0	68	FEMALE	G2	Stage I	T1	MX	NX
TCGA-CC-A3MB	315	1	36	MALE	G1	Stage IIIA	T3	M0	N0
TCGA-G3-A7M7	361	0	65	MALE	G1	Stage I	T1	MX	NX
TCGA-DD-AADC	425	1	53	MALE	G3	Stage I	T1	M0	N0
TCGA-DD-AACC	1685	1	61	MALE	G2	Stage I	T1	M0	N0
TCGA-G3-A25T	1553	0	45	FEMALE	G2	Stage IIIA	T3	M0	N0
TCGA-G3-A3CH	780	0	53	MALE	G2	Stage IIIA	T3a	M0	N0
TCGA-HP-A5N0	752	1	90	FEMALE	unknow	unknow	TX	M0	NX
TCGA-DD-A3A7	419	1	67	MALE	G3	Stage IIIB	T3b	M0	N0
TCGA-BC-4073	849	0	73	MALE	G3	Stage IIIA	T3	MX	N0
TCGA-2Y-A9HA	36	1	70	MALE	G2	Stage II	T2	MX	NX
TCGA-WX-AA44	615	0	64	FEMALE	G3	Stage I	T1	MX	NX
TCGA-DD-A39Z	601	1	43	FEMALE	G2	Stage II	T2	M0	NX
TCGA-DD-AAD5	1345	0	54	MALE	G3	Stage I	T1	M0	N0
TCGA-2Y-A9H7	1168	0	81	FEMALE	G2	Stage I	T1	MX	N0
TCGA-DD-A1EJ	1005	1	71	FEMALE	G2	Stage IIIC	T1	M0	N1
TCGA-DD-A4NG	802	1	77	MALE	G2	Stage IIIA	T3a	M0	NX
TCGA-CC-A9FS	211	0	55	MALE	G2	Stage II	T2	M0	N0
TCGA-DD-A4NO	2245	0	65	MALE	G1	Stage I	T1	M0	N0
TCGA-DD-AAVY	1970	0	56	MALE	G2	Stage IIIA	T3	M0	N0
TCGA-G3-A25Y	452	1	52	FEMALE	G3	Stage I	T1	M0	N0
TCGA-BC-A3KF	8	0	66	FEMALE	G2	Stage I	T1	M0	NX
TCGA-DD-A119	223	1	40	MALE	G3	Stage IV	T3a	M1	N0
TCGA-DD-AAVR	2513	0	44	MALE	G2	Stage I	T1	M0	N0
TCGA-UB-A7MA	848	0	62	FEMALE	G2	Stage II	T2b	M0	N0
TCGA-ZS-A9CG	341	0	55	MALE	G2	Stage II	T2	MX	NX
TCGA-ES-A2HT	438	1	54	MALE	G2	Stage I	T1	MX	NX
TCGA-G3-A7M9	56	1	70	MALE	G2	Stage IIIB	T3b	MX	NX
TCGA-DD-AADI	1085	0	43	FEMALE	G3	Stage I	T1	M0	N0
TCGA-CC-A7IK	262	1	59	MALE	G3	Stage IIIA	T3	M0	N0
TCGA-DD-AADW	587	0	48	MALE	G3	Stage I	T1	M0	N0
TCGA-FV-A4ZQ	12	0	52	MALE	G2	Stage I	T1	M0	NX
TCGA-DD-AADM	12	1	58	MALE	G3	Stage II	T2	M0	N0
TCGA-DD-AAW0	2015	0	54	MALE	G2	Stage I	T1	M0	N0
TCGA-K7-AAU7	359	0	61	MALE	G2	Stage II	T2a	MX	NX
TCGA-ED-A8O5	406	0	59	FEMALE	G3	Stage IIIA	T3a	M0	N0
TCGA-DD-A73G	3478	0	73	FEMALE	G3	Stage I	T1	M0	N0
TCGA-DD-A11B	14	1	73	MALE	G2	Stage I	T1	M0	N0
TCGA-WX-AA46	756	0	61	MALE	G1	Stage II	T2	MX	NX
TCGA-ED-A66X	406	0	35	MALE	G3	Stage IIIA	T3a	M0	N0
TCGA-BC-A10X	770	1	52	FEMALE	G2	Stage IIIA	T3a	MX	N0
TCGA-DD-AADS	474	0	63	MALE	G2	Stage I	T1	M0	N0
TCGA-MR-A520	229	0	58	MALE	G1	Stage I	T1	MX	NX
TCGA-LG-A9QD	366	0	68	MALE	G2	Stage IIIA	T3a	M0	N0
TCGA-FV-A496	10	0	84	FEMALE	G2	Stage I	T1	M0	NX
TCGA-5C-A9VG	328	0	58	MALE	G2	Stage II	T2	M0	N0
TCGA-BC-A10R	308	1	66	FEMALE	G2	unknow	T3	MX	NX
TCGA-DD-AA3A	410	1	81	FEMALE	G4	Stage I	T1	MX	N0
TCGA-DD-A73A	728	0	71	MALE	G2	Stage I	T1	M0	N0
TCGA-BW-A5NQ	0	0	63	MALE	G3	Stage I	T1	MX	NX
TCGA-DD-A4NB	989	0	25	MALE	G2	Stage I	T1	M0	N0
TCGA-DD-AADO	453	0	55	MALE	G3	Stage I	T1	M0	N0
TCGA-FV-A3R3	366	1	38	FEMALE	G2	Stage I	T1	MX	NX
TCGA-RC-A7SB	588	0	53	MALE	G2	Stage II	T2	M0	N0
TCGA-DD-AAD2	658	0	66	MALE	G2	Stage I	T1	M0	N0
TCGA-DD-A1EG	1372	1	76	MALE	G3	Stage I	T1	M0	N0
TCGA-G3-A3CI	180	0	71	MALE	G2	Stage I	T1	M0	N0
TCGA-DD-AAD1	564	0	51	FEMALE	G4	Stage I	T1	M0	N0
TCGA-DD-A11C	662	0	69	MALE	G3	Stage I	T1	M0	N0
TCGA-WX-AA47	556	1	33	FEMALE	G2	Stage IIIA	T3a	MX	NX
TCGA-NI-A4U2	1791	1	71	MALE	G1	Stage IIIA	T3	MX	NX
TCGA-2Y-A9H3	1516	0	45	MALE	G1	Stage II	T2	MX	NX
TCGA-BC-A216	1351	0	62	FEMALE	G2	Stage IIIA	T3	M0	NX
TCGA-2Y-A9H5	555	1	59	FEMALE	G3	Stage I	T1	MX	N0
TCGA-EP-A12J	570	0	62	MALE	G1	Stage I	T1	MX	NX
TCGA-DD-AACP	415	0	64	MALE	G3	Stage I	T1	M0	N0
TCGA-DD-A3A2	2131	1	76	FEMALE	G1	Stage I	T1	M0	N0
TCGA-DD-A3A0	785	1	70	MALE	G2	Stage I	T1	M0	NX
TCGA-DD-A4ND	2746	0	56	FEMALE	G3	Stage I	T1	M0	N0
TCGA-G3-AAV5	354	0	67	MALE	G2	Stage II	T2	M0	N0
TCGA-DD-AAEB	478	0	60	MALE	G2	Stage I	T1	M0	N0
TCGA-2Y-A9H8	633	1	85	FEMALE	G2	unknow	T1	MX	NX
TCGA-G3-A25S	416	1	64	MALE	G2	Stage I	T1	M0	N0
TCGA-RC-A6M5	15	0	20	FEMALE	G2	Stage IVA	T1	M0	N1
TCGA-DD-AAE4	608	0	49	FEMALE	G1	Stage I	T1	M0	N0
TCGA-DD-AACH	195	1	69	MALE	G3	Stage II	T2	M0	N0
TCGA-DD-AAD8	1219	0	73	FEMALE	G2	Stage I	T1	M0	N0
TCGA-CC-A7IH	365	0	58	MALE	G1	Stage IIIA	T3	M0	N0
TCGA-DD-AAE9	722	0	69	MALE	G3	Stage I	T1	M0	N0
TCGA-DD-AADA	1233	0	66	FEMALE	G3	Stage I	T1	M0	N0
TCGA-DD-A39X	1694	1	78	FEMALE	G2	Stage I	T1	M0	NX
TCGA-DD-AADE	1202	0	50	MALE	G4	Stage I	T1	M0	N0
TCGA-K7-A5RG	519	0	66	MALE	G1	Stage I	T1	MX	NX
TCGA-DD-AAVW	2317	0	35	MALE	G2	Stage I	T1	M0	N0
TCGA-G3-A5SI	768	1	44	MALE	G2	Stage II	T2	M0	N0
TCGA-MR-A8JO	330	0	34	MALE	G3	Stage I	T1	MX	N0
TCGA-DD-AAE1	552	0	52	MALE	G3	Stage I	T1	M0	N0
TCGA-DD-A4NN	899	1	56	FEMALE	G3	Stage I	T1	M0	N0
TCGA-BW-A5NP	0	0	26	FEMALE	G3	Stage IV	T2	M1	N0
TCGA-CC-A8HV	279	1	51	FEMALE	G2	Stage II	T2	M0	N0
TCGA-G3-A3CK	585	0	61	MALE	G2	Stage I	T1	M0	N0
TCGA-EP-A26S	608	0	70	MALE	G2	Stage I	T1	MX	N0
TCGA-2Y-A9GX	2442	0	68	MALE	G2	Stage I	T1	MX	NX
TCGA-RC-A7S9	640	0	47	FEMALE	G3	Stage I	T1	M0	N0
TCGA-YA-A8S7	412	1	68	MALE	G3	Stage IIIA	T3a	MX	N0
TCGA-DD-A3A3	535	1	45	MALE	G2	Stage I	T1	M0	N0
TCGA-O8-A75V	538	0	54	MALE	G2	Stage I	T1	MX	NX
TCGA-ZP-A9D0	1091	0	67	FEMALE	G1	unknow	T1	MX	NX
TCGA-DD-A1EE	349	1	73	MALE	G3	Stage IIIA	T3	M0	N0
TCGA-DD-A3A6	3258	1	72	FEMALE	G2	Stage II	T2	M0	N0
TCGA-RC-A6M4	22	0	74	FEMALE	G2	Stage IIIA	T3	MX	NX
TCGA-DD-AAD6	672	0	66	MALE	G3	Stage IIIA	T3a	M0	N0
TCGA-K7-A5RF	631	0	64	MALE	G1	Stage I	T1	MX	NX
TCGA-CC-A8HS	300	1	18	MALE	G1	Stage IIIC	T3	M0	N1
TCGA-G3-A5SK	744	0	58	MALE	G1	Stage I	T1	M0	NX
TCGA-DD-A4NQ	373	1	60	MALE	G3	Stage II	T2	M0	N0
TCGA-DD-A1ED	2301	0	68	MALE	G1	Stage I	T1	M0	N0
TCGA-G3-AAV3	412	0	58	FEMALE	G2	Stage II	T2	M0	N0
TCGA-ZP-A9CV	1088	1	59	MALE	G1	unknow	T1	MX	NX
TCGA-DD-AACV	1531	0	53	MALE	G3	Stage I	T1	M0	N0
TCGA-DD-AACG	469	1	52	MALE	G4	Stage II	T2	M0	N0
TCGA-CC-A3MA	303	1	61	MALE	G2	Stage IIIA	T3	M0	N0
TCGA-2V-A95S		0	unknow	MALE	G3	Stage II	T2	MX	NX
TCGA-2Y-A9H1	1229	1	58	MALE	G2	Stage I	T1	MX	NX
TCGA-DD-A4NF	942	0	72	MALE	G2	Stage I	T1	M0	N0
TCGA-DD-A3A1	233	1	65	MALE	G2	Stage IIIA	T3b	M0	N0
TCGA-KR-A7K2	829	0	64	MALE	G1	Stage I	T1	M0	N0
TCGA-DD-AAC9	347	0	51	MALE	G2	Stage I	T1	M0	N0
TCGA-DD-AACJ	2102	0	75	MALE	G2	Stage II	T2	M0	N0
TCGA-DD-AACN	1302	0	32	MALE	G3	Stage I	T1	M0	N0
TCGA-GJ-A6C0	31	1	75	FEMALE	G2	Stage II	T2	MX	NX
TCGA-DD-AAE8	664	0	45	MALE	G3	Stage I	T1	M0	N0
TCGA-DD-AADV	574	0	50	MALE	G3	Stage I	T1	M0	N0
TCGA-FV-A3I1	247	1	81	FEMALE	G2	Stage II	T2	MX	N0
TCGA-BC-A10Q	1135	1	72	FEMALE	unknow	unknow	T2	MX	NX
TCGA-2Y-A9GS	724	1	58	MALE	G2	unknow	T2	MX	NX
TCGA-ED-A7PX	6	0	48	FEMALE	G3	Stage II	T2	M0	NX
TCGA-DD-A3A8	11	1	75	MALE	G2	Stage II	T2	M0	N0
TCGA-G3-A7M6	632	0	60	FEMALE	G3	Stage I	T1	MX	NX
TCGA-KR-A7K8	906	0	57	MALE	G1	Stage I	T1	M0	N0
TCGA-5R-AA1D	449	0	17	FEMALE	G3	Stage IIIA	T3a	M0	N0

## Sheet: ICGC-FR
icgc_donor_id	project_code	study_donor_involved_in	submitted_donor_id	donor_sex	donor_vital_status	disease_status_last_followup	donor_relapse_type	donor_age_at_diagnosis	donor_age_at_enrollment	donor_age_at_last_followup	donor_relapse_interval	donor_diagnosis_icd10	donor_tumour_staging_system_at_diagnosis	donor_tumour_stage_at_diagnosis	donor_tumour_stage_at_diagnosis_supplemental	donor_survival_time	donor_interval_of_last_followup	prior_malignancy	cancer_type_prior_malignancy	cancer_history_first_degree_relative
DO50875	LICA-FR		CHC1600	male				69	69			C22.0						unknown		unknown
DO50877	LICA-FR		CHC1601	male	alive	complete remission		75	75	78	1092	C22.0	TNM 7th ed	T1N0M0	BCLC:A	1092	1092	unknown		unknown
DO50879	LICA-FR		CHC1602	male				71	71			C22.0						unknown		unknown
DO50871	LICA-FR		CHC1595	male	alive	complete remission		74	74	81	1826	C22.0	TNM 7th ed	T3bN0M0	BCLC:A	1826	1826	unknown		unknown
DO50872	LICA-FR		CHC1596	male	alive	relapse	local recurrence	66	66	69	483	C22.0	TNM 7th ed	T1N0M0	BCLC:A	1077	1077	unknown		unknown
DO50873	LICA-FR		CHC1597	male	deceased	relapse	local recurrence	41	41	41	110	C22.0	TNM 7th ed	T3bN0M0	BCLC:C	192	192	unknown		unknown
DO50874	LICA-FR		CHC1598	female				76	76			C22.0						unknown		unknown
DO50864	LICA-FR		CHC1566	male	deceased	relapse	local recurrence	68	68	71	159	C22.0	TNM 7th ed	T2N0M0	BCLC:A	890	890	unknown		unknown
DO50865	LICA-FR		CHC1568	male				71	71			C22.0						unknown		unknown
DO50866	LICA-FR		CHC1569	male	alive	complete remission		84	84	90	1826	C22.0	TNM 7th ed	T3bN0M0	BCLC:C	1826	1826	unknown		unknown
DO50867	LICA-FR		CHC1591	male				60	60			C22.0						unknown		unknown
DO50868	LICA-FR		CHC1592	female	alive	complete remission		69	69	74	1826	C22.0	TNM 7th ed	T2N0M0	BCLC:0	1826	1826	unknown		unknown
DO50869	LICA-FR		CHC1594	female				76	76			C22.0						unknown		unknown
DO50860	LICA-FR		CHC1539	male				45	45			C22.0						unknown		unknown
DO50861	LICA-FR		CHC1545	male				77	77			C22.0						unknown		unknown
DO50862	LICA-FR		CHC1556	female	alive	relapse	local recurrence	54	54	62	986	C22.0	TNM 7th ed	T2N0M0	BCLC:A	1826	1826	unknown		unknown
DO50853	LICA-FR		CHC1211	female				32	32			C22.0						unknown		unknown
DO50854	LICA-FR		CHC1530	male				64	64			C22.0						unknown		unknown
DO50856	LICA-FR		CHC1531	male	deceased	relapse	local recurrence	78	78	78	284	C22.0	TNM 7th ed	T2N0M0	BCLC:A	295	295	unknown		unknown
DO50858	LICA-FR		CHC1534	male				67	67			C22.0						unknown		unknown
DO50852	LICA-FR		CHC1210	female				44	44			C22.0						unknown		unknown
DO50843	LICA-FR		CHC1191	male	alive	relapse	local recurrence	58	58	66	1826	C22.0	TNM 7th ed	T1N0M0	BCLC:A	1826	1826	unknown		unknown
DO50846	LICA-FR		CHC1205	male	alive	relapse	local recurrence	72	72	73	49	C22.0	TNM 7th ed	T3bN0M0	BCLC:C	352	352	unknown		unknown
DO50847	LICA-FR		CHC1207	male				60	60			C22.0						unknown		unknown
DO50849	LICA-FR		CHC1209	male	deceased	relapse	local recurrence	66	66	67	384	C22.0	TNM 7th ed	T2N0M0	BCLC:A	560	560	unknown		unknown
DO50841	LICA-FR		CHC1186	male	alive	complete remission		56	56	62	1826	C22.0	TNM 7th ed	T2N0M0	BCLC:A	1826	1826	unknown		unknown
DO50833	LICA-FR		CHC1177	male	alive	relapse	local recurrence	63	63	72	970	C22.0	TNM 7th ed	T1N0M0	BCLC:0	1826	1826	unknown		unknown
DO50835	LICA-FR		CHC1180	male				65	65			C22.0						unknown		unknown
DO50836	LICA-FR		CHC1182	female	alive	complete remission		52	52	58	1826	C22.0	TNM 7th ed	T2N0M0	BCLC:A	1826	1826	unknown		unknown
DO50838	LICA-FR		CHC1183	male				60	60			C22.0						unknown		unknown
DO50830	LICA-FR		CHC1152	male	deceased	relapse	local recurrence	63	63	63	113	C22.0	TNM 7th ed	T3bN0M0	BCLC:C	144	144	unknown		unknown
DO50828	LICA-FR		CHC1148	male				69	69			C22.0						unknown		unknown
DO50821	LICA-FR		CHC1079	male	alive	complete remission		60	60	65	1510	C22.0	TNM 7th ed	T2N0M0	BCLC:A	1510	1510	unknown		unknown
DO50823	LICA-FR		CHC1081	male	alive	complete remission		53	53	59	1826	C22.0	TNM 7th ed	T2N0M0	BCLC:A	1826	1826	unknown		unknown
DO50824	LICA-FR		CHC1085	male	alive	complete remission		49	49	53	1312	C22.0	TNM 7th ed	T2N0M0	BCLC:A	1312	1312	unknown		unknown
DO50826	LICA-FR		CHC1137	male				57	57			C22.0						unknown		unknown
DO50810	LICA-FR		CHC1010	female				53	53			C22.0						unknown		unknown
DO50812	LICA-FR		CHC1028	male	alive	complete remission		62	62	65	1147	C22.0	TNM 7th ed	T2N0M0	BCLC:A	1147	1147	unknown		unknown
DO50897	LICA-FR		CHC1720	male	deceased	complete remission		80	80	81	423	C22.0	TNM 7th ed	T2N0M0	BCLC:A	423	423	unknown		unknown
DO50898	LICA-FR		CHC1725	female				83	83			C22.0						unknown		unknown
DO50899	LICA-FR		CHC1731	female				55	55			C22.0						unknown		unknown
DO50890	LICA-FR		CHC1708	male	alive	complete remission		53	53	57	1217	C22.0	TNM 7th ed	T3aN0M0	BCLC:B	1217	1217	unknown		unknown
DO50891	LICA-FR		CHC1712	male	alive	complete remission		60	60	61	195	C22.0	TNM 7th ed	T2N0M0	BCLC:B	195	195	unknown		unknown
DO50892	LICA-FR		CHC1714	male	alive	complete remission		72	72	76	1357	C22.0	TNM 7th ed	T2N0M0	BCLC:A	1357	1357	unknown		unknown
DO50893	LICA-FR		CHC1715	male				72	72			C22.0						unknown		unknown
DO50894	LICA-FR		CHC1717	male				50	50			C22.0						unknown		unknown
DO50895	LICA-FR		CHC1719	male	alive	complete remission		57	57	60	1085	C22.0	TNM 7th ed	T1N0M0	BCLC:A	1085	1085	unknown		unknown
DO50886	LICA-FR		CHC1629	male				64	64			C22.0						unknown		unknown
DO50888	LICA-FR		CHC1700	male	alive	complete remission		63	63	66	1214	C22.0	TNM 7th ed	T2N0M0	BCLC:A	1214	1214	unknown		unknown
DO50889	LICA-FR		CHC1704	male				43	43			C22.0						unknown		unknown
DO50880	LICA-FR		CHC1603	male				78	78			C22.0						unknown		unknown
DO50881	LICA-FR		CHC1604	male				56	56			C22.0						unknown		unknown
DO50882	LICA-FR		CHC1611	male	deceased	complete remission		75	75	75	74	C22.0	TNM 7th ed	T1N0M0	BCLC:A	74	74	unknown		unknown
DO50883	LICA-FR		CHC1616	female				77	77			C22.0						unknown		unknown
DO50884	LICA-FR		CHC1624	male	alive	complete remission		59	59	61	757	C22.0	TNM 7th ed	T2N0M0	BCLC:A	757	757	unknown		unknown
DO50885	LICA-FR		CHC1626	male				75	75			C22.0						unknown		unknown
DO50754	LICA-FR		BCM339	male	alive	relapse	local recurrence	62	62	62	89	C22.0			BCLC:C	1826	1826	unknown		unknown
DO50755	LICA-FR		BCM371	female	alive	relapse	local recurrence	78	78	78	235	C22.0			BCLC:0	1826	1826	unknown		unknown
DO50756	LICA-FR		BCM375	male	deceased	relapse	local recurrence	72	72	72	283	C22.0			BCLC:A	495	495	unknown		unknown
DO50757	LICA-FR		BCM397	male	alive	relapse	local recurrence	61	61	61	300	C22.0			BCLC:A	1826	1826	unknown		unknown
DO50758	LICA-FR		BCM399	female	deceased	relapse	local recurrence	81	81	81	120	C22.0			BCLC:A	297	297	unknown		unknown
DO50759	LICA-FR		BCM423	male	deceased	relapse	local recurrence	53	53	53	393	C22.0			BCLC:A	1541	1541	unknown		unknown
DO50750	LICA-FR		BCM321	male	deceased	relapse	local recurrence	78	78	78	77	C22.0			BCLC:A	1325	1325	unknown		unknown
DO50751	LICA-FR		BCM325	male	alive	relapse	local recurrence	67	67	67	610	C22.0			BCLC:A	1826	1826	unknown		unknown
DO50752	LICA-FR		BCM329	male	deceased	relapse	local recurrence	66	66	66	725	C22.0			BCLC:A	751	751	unknown		unknown
DO50753	LICA-FR		BCM337	male	deceased	relapse	local recurrence	61	61	61	193	C22.0			BCLC:A	905	905	unknown		unknown
DO50743	LICA-FR		BCB307	male	deceased	relapse	local recurrence	59	59	59	740	C22.0			BCLC:A	985	985	unknown		unknown
DO50744	LICA-FR		BCB325	female	deceased	relapse	local recurrence	60	60	60	1717	C22.0			BCLC:A	1826	1826	unknown		unknown
DO50745	LICA-FR		BCM229	female	deceased	relapse	local recurrence	79	79	79	163	C22.0			BCLC:B	636	636	unknown		unknown
DO50746	LICA-FR		BCM257	male	deceased	relapse	local recurrence	53	53	53	371	C22.0			BCLC:A	871	871	unknown		unknown
DO50747	LICA-FR		BCM265	male	deceased	relapse	local recurrence	75	75	75	244	C22.0			BCLC:A	619	619	unknown		unknown
DO50748	LICA-FR		BCM269	male	deceased	relapse	local recurrence	67	67	67	251	C22.0			BCLC:A	684	684	unknown		unknown
DO50749	LICA-FR		BCM275	male	deceased	relapse	local recurrence	73	73	73	110	C22.0			BCLC:A	226	226	unknown		unknown
DO50740	LICA-FR		BCB167	female	deceased	relapse	local recurrence	59	59	59	119	C22.0			BCLC:A	189	189	unknown		unknown
DO50741	LICA-FR		BCB231	male	deceased	relapse	local recurrence	73	73	73	417	C22.0			BCLC:A	1826	1826	unknown		unknown
DO50742	LICA-FR		BCB301	male	deceased	relapse	local recurrence	51	51	51	379	C22.0			BCLC:A	1036	1036	unknown		unknown
DO50736	LICA-FR		BCB109	male	deceased	relapse	local recurrence	59	59	59	145	C22.0			BCLC:A	196	196	unknown		unknown
DO50737	LICA-FR		BCB111	male	deceased	relapse	local recurrence	66	66	66	875	C22.0			BCLC:A	1826	1826	unknown		unknown
DO50738	LICA-FR		BCB151	male	alive	relapse	local recurrence	72	72	72	364	C22.0			BCLC:A	1715	1715	unknown		unknown
DO50739	LICA-FR		BCB157	male	alive	relapse	local recurrence	71	71	71	244	C22.0			BCLC:A	1142	1142	unknown		unknown
DO50790	LICA-FR		BCM739	male	deceased	relapse	local recurrence	62	62	62	43	C22.0			BCLC:A	694	694	unknown		unknown
DO50792	LICA-FR		BCM759	male	deceased	relapse	local recurrence	62	62	62	39	C22.0			BCLC:A	187	187	unknown		unknown
DO50794	LICA-FR		BCM769	male	deceased	relapse	local recurrence	66	66	66	126	C22.0			BCLC:C	217	217	unknown		unknown
DO50795	LICA-FR		BCM783	male	deceased	relapse	local recurrence	63	63	63	606	C22.0			BCLC:B	879	879	unknown		unknown
DO50797	LICA-FR		BCM791	male	deceased	relapse	local recurrence	62	62	62	137	C22.0			BCLC:A	255	255	unknown		unknown
DO50788	LICA-FR		BCM735	female	deceased	relapse	local recurrence	61	61	61	287	C22.0			BCLC:A	616	616	unknown		unknown
DO50781	LICA-FR		BCM695	female	deceased	relapse	local recurrence	70	70	70	250	C22.0			BCLC:C	454	454	unknown		unknown
DO50782	LICA-FR		BCM703	male	deceased	relapse	local recurrence	74	74	74	606	C22.0			BCLC:A	1826	1826	unknown		unknown
DO50784	LICA-FR		BCM711	male	deceased	relapse	local recurrence	69	69	69	298	C22.0			BCLC:A	1324	1324	unknown		unknown
DO50786	LICA-FR		BCM723	male	deceased	relapse	local recurrence	63	63	63	329	C22.0			BCLC:A	671	671	unknown		unknown
DO50777	LICA-FR		BCM683	male	deceased	relapse	local recurrence	75	75	75	312	C22.0			BCLC:A	1105	1105	unknown		unknown
DO50779	LICA-FR		BCM689	male	deceased	relapse	local recurrence	63	63	63	546	C22.0			BCLC:A	984	984	unknown		unknown
DO50770	LICA-FR		BCM567	male	deceased	relapse	local recurrence	72	72	72	694	C22.0			BCLC:A	976	976	unknown		unknown
DO50771	LICA-FR		BCM617	male	deceased	relapse	local recurrence	63	63	63	298	C22.0			BCLC:A	706	706	unknown		unknown
DO50773	LICA-FR		BCM643	male	deceased	relapse	local recurrence	50	50	50	429	C22.0			BCLC:A	1030	1030	unknown		unknown
DO50775	LICA-FR		BCM671	female	deceased	relapse	local recurrence	71	71	71	363	C22.0			BCLC:A	1528	1528	unknown		unknown
DO50765	LICA-FR		BCM529	female	deceased	relapse	local recurrence	56	56	56	357	C22.0			BCLC:A	788	788	unknown		unknown
DO50766	LICA-FR		BCM531	male	deceased	relapse	local recurrence	49	49	49	241	C22.0			BCLC:A	352	352	unknown		unknown
DO50767	LICA-FR		BCM543	male	deceased	relapse	local recurrence	61	61	61	124	C22.0			BCLC:B	323	323	unknown		unknown
DO50768	LICA-FR		BCM545	male	deceased	relapse	local recurrence	63	63	63	308	C22.0			BCLC:B	580	580	unknown		unknown
DO50769	LICA-FR		BCM565	male	deceased	relapse	local recurrence	51	51	51	254	C22.0			BCLC:A	1303	1303	unknown		unknown
DO50760	LICA-FR		BCM439	female	deceased	relapse	local recurrence	79	79	79	125	C22.0			BCLC:A	314	314	unknown		unknown
DO50761	LICA-FR		BCM455	male	deceased	relapse	local recurrence	61	61	61	87	C22.0			BCLC:A	1369	1369	unknown		unknown
DO50762	LICA-FR		BCM483	male	deceased	relapse	local recurrence	59	59	59	247	C22.0			BCLC:A	590	590	unknown		unknown
DO50763	LICA-FR		BCM489	female	deceased	relapse	local recurrence	47	47	47	325	C22.0			BCLC:A	875	875	unknown		unknown
DO50764	LICA-FR		BCM501	female	deceased	relapse	local recurrence	64	64	64	50	C22.0			BCLC:B	114	114	unknown		unknown
DO231795	LICA-FR		CHC2557	male				69	69			C22.0						unknown		unknown
DO231867	LICA-FR		CHC3618	male				53	53			C22.0						unknown		unknown
DO231864	LICA-FR		CHC3238	female				58	58			C22.0						unknown		unknown
DO231878	LICA-FR		CHC3624	male				64	64			C22.0						unknown		unknown
DO231877	LICA-FR		CHC3621	male				55	55			C22.0						unknown		unknown
DO231870	LICA-FR		CHC3619	male				66	66			C22.0						unknown		unknown
DO231873	LICA-FR		CHC3620	male				35	35			C22.0						unknown		unknown
DO231889	LICA-FR		CHC3631	male				85	85			C22.0						unknown		unknown
DO231886	LICA-FR		CHC3628	male				86	86			C22.0						unknown		unknown
DO231882	LICA-FR		CHC3626	male				82	82			C22.0						unknown		unknown
DO231884	LICA-FR		CHC3627S	male				55	55			C22.0						unknown		unknown
DO231898	LICA-FR		CHC3641	male				47	47			C22.0						unknown		unknown
DO231894	LICA-FR		CHC3638S	male				84	84			C22.0						unknown		unknown
DO231891	LICA-FR		CHC3633	male				70	70			C22.0						unknown		unknown
DO231806	LICA-FR		CHC2207	male				49	49			C22.0						unknown		unknown
DO231817	LICA-FR		CHC1189	male				62	62			C22.0						unknown		unknown
DO231823	LICA-FR		CHC2210	male				66	66			C22.0						unknown		unknown
DO231825	LICA-FR		CHC2415	male				68	68			C22.0						unknown		unknown
DO231820	LICA-FR		CHC985	male				55	55			C22.0						unknown		unknown
DO231828	LICA-FR		CHC2491	male				66	66			C22.0						unknown		unknown
DO231834	LICA-FR		CHC2686	female				52	52			C22.0						unknown		unknown
DO231831	LICA-FR		CHC2560	male				73	73			C22.0						unknown		unknown
DO231838	LICA-FR		CHC2687	male				76	76			C22.0						unknown		unknown
DO231846	LICA-FR		CHC2706	male				70	70			C22.0						unknown		unknown
DO231842	LICA-FR		CHC2696	male				66	66			C22.0						unknown		unknown
DO231849	LICA-FR		CHC2135	female				57	57			C22.0						unknown		unknown
DO231840	LICA-FR		CHC2695	male				90	90			C22.0						unknown		unknown
DO231901	LICA-FR		CHC3643	male				53	53			C22.0						unknown		unknown
DO231903	LICA-FR		CHC3644	male				50	50			C22.0						unknown		unknown
DO231908	LICA-FR		CHC3685	female				53	53			C22.0						unknown		unknown
DO231905	LICA-FR		CHC3647	male				56	56			C22.0						unknown		unknown
DO231907	LICA-FR		CHC3650	female				67	67			C22.0						unknown		unknown
DO231911	LICA-FR		CHC1208	male				47	47			C22.0						unknown		unknown
DO231912	LICA-FR		CHC1548	male				55	55			C22.0						unknown		unknown
DO231913	LICA-FR		CHC1994	male				57	57			C22.0						unknown		unknown
DO231919	LICA-FR		CHC3798	female				51	51			C22.0						unknown		unknown
DO231915	LICA-FR		CHC2844	male				55	55			C22.0						unknown		unknown
DO231916	LICA-FR		CHC2899	male				52	52			C22.0						unknown		unknown
DO231917	LICA-FR		CHC3029	female				53	53			C22.0						unknown		unknown
DO231918	LICA-FR		CHC3788	male				58	58			C22.0						unknown		unknown
DO231922	LICA-FR		CHC3880	female				32	32			C22.0						unknown		unknown
DO231923	LICA-FR		CHC3894	male				56	56			C22.0						unknown		unknown
DO231924	LICA-FR		CHC3914S	male				68	68			C22.0						unknown		unknown
DO231925	LICA-FR		CHC4041S	female				65	65			C22.0						unknown		unknown
DO231920	LICA-FR		CHC3825	male				74	74			C22.0						unknown		unknown
DO231921	LICA-FR		CHC3864	male				69	69			C22.0						unknown		unknown
DO231926	LICA-FR		CHC4042	female				59	59			C22.0						unknown		unknown
DO231927	LICA-FR		CHC4043	male				73	73			C22.0						unknown		unknown
DO231928	LICA-FR		CHC4046	male				59	59			C22.0						unknown		unknown
DO231929	LICA-FR		CHC4049	male				42	42			C22.0						unknown		unknown
DO231930	LICA-FR		CHC4051	male				73	73			C22.0						unknown		unknown
DO231931	LICA-FR		CHC4055S	male				63	63			C22.0						unknown		unknown
DO231932	LICA-FR		CHC900	male				41	41			C22.0						unknown		unknown
DO228901	LICA-FR		CHC2132	male				57	57			C22.0						unknown		unknown
DO228904	LICA-FR		CHC2707	male				79	79			C22.0						unknown		unknown
DO228907	LICA-FR		CHC2449	male				81	81			C22.0						unknown		unknown
DO228906	LICA-FR		CHC2448	male				81	81			C22.0						unknown		unknown
DO228887	LICA-FR		CHC2199	male				69	69			C22.0						unknown		unknown
DO228883	LICA-FR		CHC2539	female				41	41			C22.0						unknown		unknown
DO228897	LICA-FR		CHC2443	male				74	74			C22.0						unknown		unknown
DO228898	LICA-FR		CHC2538	female				76	76			C22.0						unknown		unknown
DO228893	LICA-FR		CHC2691	male				68	68			C22.0						unknown		unknown
DO228894	LICA-FR		CHC2697	male				64	64			C22.0						unknown		unknown
DO50974	LICA-FR		CHC912	male				78	78			C22.0						unknown		unknown
DO50976	LICA-FR		CHC923	male	deceased	relapse	local recurrence	74	74	74	135	C22.0	TNM 7th ed	T1N0M0	BCLC:A	213	213	unknown		unknown
DO50970	LICA-FR		CHC892	female				72	72			C22.0						unknown		unknown
DO50971	LICA-FR		CHC896	male	alive	relapse	local recurrence	61	61	66	420	C22.0	TNM 7th ed	T3bN0M0	BCLC:C	1514	1514	unknown		unknown
DO50972	LICA-FR		CHC898	male				71	71			C22.0						unknown		unknown
DO50973	LICA-FR		CHC902	male	alive	complete remission		73	73	77	1440	C22.0	TNM 7th ed	T1N0M0	BCLC:A	1440	1440	unknown		unknown
DO50963	LICA-FR		CHC799	female	alive	relapse	local recurrence	65	65	72	394	C22.0	TNM 7th ed	T2N0M0	BCLC:A	1826	1826	unknown		unknown
DO50964	LICA-FR		CHC801	male	deceased	complete remission		78	78	82	1429	C22.0	TNM 7th ed	T1N0M0	BCLC:A	1429	1429	unknown		unknown
DO50966	LICA-FR		CHC805	male	alive	complete remission		58	58	64	1826	C22.0	TNM 7th ed	T1N0M0	BCLC:A	1826	1826	unknown		unknown
DO50967	LICA-FR		CHC879	male	deceased	relapse	local recurrence	80	80	84	1392	C22.0	TNM 7th ed	T2N0M0	BCLC:A	1392	1392	unknown		unknown
DO50968	LICA-FR		CHC884	male				75	75			C22.0						unknown		unknown
DO50969	LICA-FR		CHC889	male				71	71			C22.0						unknown		unknown
DO50960	LICA-FR		CHC736	male				77	77			C22.0						unknown		unknown
DO50961	LICA-FR		CHC789	male	deceased	relapse	local recurrence	54	54	55	165	C22.0	TNM 7th ed	T3bN0M0	BCLC:B	349	349	unknown		unknown
DO50962	LICA-FR		CHC796	male				76	76			C22.0						unknown		unknown
DO50952	LICA-FR		CHC2358	male				65	65			C22.0	TNM 7th ed	T2N0M0	BCLC:B			unknown		unknown
DO50953	LICA-FR		CHC2362	male				49	49			C22.0	TNM 7th ed	T2N0M0	BCLC:A			unknown		unknown
DO50954	LICA-FR		CHC432	male				70	70			C22.0						unknown		unknown
DO50955	LICA-FR		CHC451	male	alive	complete remission		75	75	81	1826	C22.0	TNM 7th ed	T1N0M0	BCLC:A	1826	1826	unknown		unknown
DO50956	LICA-FR		CHC510	female	alive	complete remission		17	17	23	1826	C22.0	TNM 7th ed	T1N0M0	BCLC:A	1826	1826	unknown		unknown
DO50957	LICA-FR		CHC703	male	alive	complete remission		55	55	61	1826	C22.0	TNM 7th ed	T2N0M0	BCLC:A	1826	1826	unknown		unknown
DO50958	LICA-FR		CHC734	male	deceased	relapse	local recurrence	65	65	69	1410	C22.0	TNM 7th ed	T3aN0M0	BCLC:B	1499	1499	unknown		unknown
DO50950	LICA-FR		CHC2216	male	alive	relapse	local recurrence	62	62	63	214	C22.0	TNM 7th ed	T3aN0M0	BCLC:A	444	444	unknown		unknown
DO50951	LICA-FR		CHC2351	male				68	68			C22.0	TNM 7th ed	T3bN0M0	BCLC:C			unknown		unknown
DO50949	LICA-FR		CHC2215	male	alive	complete remission		65	65	66	383	C22.0	TNM 7th ed	T1N0M0	BCLC:A	383	383	unknown		unknown
DO50942	LICA-FR		CHC2202	female	deceased	relapse	local recurrence	48	48	48	30	C22.0	TNM 7th ed	T3bN0M0	BCLC:B	227	227	unknown		unknown
DO50944	LICA-FR		CHC2206	male				90	90			C22.0						unknown		unknown
DO50946	LICA-FR		CHC2208	male				53	53			C22.0						unknown		unknown
DO50947	LICA-FR		CHC2211	female	alive	relapse	local recurrence	37	37	39	560	C22.0	TNM 7th ed	T4N0M1	BCLC:B	560	560	unknown		unknown
DO50948	LICA-FR		CHC2213	male	alive	complete remission		33	33	33	140	C22.0	TNM 7th ed	T1N0M0	BCLC:A	140	140	unknown		unknown
DO50940	LICA-FR		CHC2141	male				74	74			C22.0						unknown		unknown
DO50938	LICA-FR		CHC2128	female				53	53			C22.0						unknown		unknown
DO50939	LICA-FR		CHC2134	female	alive	complete remission		57	57	57	223	C22.0	TNM 7th ed	T3bN0M0	BCLC:C	223	223	unknown		unknown
DO50930	LICA-FR		CHC2099	male	deceased	relapse	local recurrence	73	73	74	30	C22.0	TNM 7th ed	T2N0M0	BCLC:C	308	308	unknown		unknown
DO50931	LICA-FR		CHC2103	male				57	57			C22.0						unknown		unknown
DO50932	LICA-FR		CHC2110bis	male	alive	complete remission		58	58	59	420	C22.0	TNM 7th ed	T2N0M0	BCLC:A	420	420	unknown		unknown
DO50933	LICA-FR		CHC2111	female				56	56			C22.0						unknown		unknown
DO50934	LICA-FR		CHC2112	female				48	48			C22.0						unknown		unknown
DO50935	LICA-FR		CHC2113	male				61	61			C22.0						unknown		unknown
DO50936	LICA-FR		CHC2115	male				75	75			C22.0						unknown		unknown
DO50937	LICA-FR		CHC2127	male	alive	relapse	local recurrence	56	56	59	30	C22.0	TNM 7th ed	T3aN0M0	BCLC:B	690	690	unknown		unknown
DO50927	LICA-FR		CHC2048	male				65	65			C22.0						unknown		unknown
DO50928	LICA-FR		CHC2052	male	deceased	relapse	local recurrence	61	61	62	30	C22.0	TNM 7th ed	T3bN0M0	BCLC:B	331	331	unknown		unknown
DO50929	LICA-FR		CHC2098	male	alive	complete remission		85	85	86	412	C22.0	TNM 7th ed	T1N0M0	BCLC:A	412	412	unknown		unknown
DO50920	LICA-FR		CHC1757	male				41	41			C22.0						unknown		unknown
DO50921	LICA-FR		CHC1763	male				75	75			C22.0						unknown		unknown
DO50922	LICA-FR		CHC1774	male				65	65			C22.0	TNM 7th ed	T2N0M0	BCLC:A			unknown		unknown
DO50923	LICA-FR		CHC2029	male	alive	complete remission		74	74	76	1050	C22.0	TNM 7th ed	T2N0M0	BCLC:B	1050	1050	unknown		unknown
DO50924	LICA-FR		CHC2034	male	deceased	relapse	local recurrence	80	80	81	261	C22.0	TNM 7th ed	T2N0M0	BCLC:C	449	449	unknown		unknown
DO50925	LICA-FR		CHC2039bis	male	alive	relapse	local recurrence	69	69	72	934	C22.0	TNM 7th ed	T1N0M0	BCLC:A	953	953	unknown		unknown
DO50926	LICA-FR		CHC2043	female	alive	complete remission		21	21	24	1063	C22.0	TNM 7th ed	T1N0M0	BCLC:A	1063	1063	unknown		unknown
DO50916	LICA-FR		CHC1753	male				65	65			C22.0						unknown		unknown
DO50917	LICA-FR		CHC1754	male				34	34			C22.0						unknown		unknown
DO50919	LICA-FR		CHC1756	male				73	73			C22.0						unknown		unknown
DO50910	LICA-FR		CHC1745	female				69	69			C22.0						unknown		unknown
DO50911	LICA-FR		CHC1746	male				75	75			C22.0						unknown		unknown
DO50912	LICA-FR		CHC1747	male				54	54			C22.0						unknown		unknown
DO50913	LICA-FR		CHC1749	male				66	66			C22.0						unknown		unknown
DO50914	LICA-FR		CHC1750	male	alive	relapse	local recurrence	52	52	60	611	C22.0	TNM 7th ed	T2N0M0	BCLC:A	1826	1826	unknown		unknown
DO50915	LICA-FR		CHC1751	male	deceased	relapse	local recurrence	52	52	55	1096	C22.0	TNM 7th ed	T3aN0M0	BCLC:B	1193	1193	unknown		unknown
DO50905	LICA-FR		CHC1739	male				55	55			C22.0						unknown		unknown
DO50906	LICA-FR		CHC1741	male				57	57			C22.0						unknown		unknown
DO50907	LICA-FR		CHC1742	male				67	67			C22.0						unknown		unknown
DO50908	LICA-FR		CHC1743	male	deceased	relapse	local recurrence	64	64	68	1026	C22.0	TNM 7th ed	T2N0M0	BCLC:A	1612	1612	unknown		unknown
DO50909	LICA-FR		CHC1744	male				50	50			C22.0						unknown		unknown
DO50900	LICA-FR		CHC1732	male				49	49			C22.0						unknown		unknown
DO50901	LICA-FR		CHC1734	male	alive	complete remission		76	76	81	1668	C22.0	TNM 7th ed	T2N0M0	BCLC:B	1668	1668	unknown		unknown
DO50902	LICA-FR		CHC1736	male				58	58			C22.0						unknown		unknown
DO50903	LICA-FR		CHC1737	male				73	73			C22.0						unknown		unknown
DO50904	LICA-FR		CHC1738	female	alive	complete remission		68	68	74	1826	C22.0	TNM 7th ed	T1N0M0	BCLC:A	1826	1826	unknown		unknown
DO44754	LICA-FR		CHC218	male				69	69			C22.0						unknown		unknown
DO44752	LICA-FR		CHC211	male	deceased	relapse	local recurrence	69	69	70	365	C22.0	TNM 7th ed	T3bN0M0	BCLC:C	365	365	unknown		unknown
DO44758	LICA-FR		CHC228	male	deceased	relapse	local recurrence	48	48	50	145	C22.0	TNM 7th ed	T3bN0M0	BCLC:C	449	449	unknown		unknown
DO44756	LICA-FR		CHC226	male	alive	complete remission		42	42	42	30	C22.0	TNM 7th ed	T3bN0M0	BCLC:C	30	30	unknown		unknown
DO44750	LICA-FR		CHC210	male	deceased	relapse	local recurrence	58	58	59	145	C22.0	TNM 7th ed	T2N0M0	BCLC:B	296	296	unknown		unknown
DO44742	LICA-FR		CHC203	male	deceased	complete remission		46	46	47	452	C22.0	TNM 7th ed	T1N0M0	BCLC:A	452	452	unknown		unknown
DO44740	LICA-FR	PCAWG	CHC197	male				73	73			C22.0						unknown		unknown
DO44746	LICA-FR		CHC206	male	alive	complete remission		64	64	69	1826	C22.0	TNM 7th ed	T2N0M0	BCLC:B	1826	1826	unknown		unknown
DO44744	LICA-FR	PCAWG	CHC205	male	deceased	relapse	local recurrence	46	46	47	63	C22.0	TNM 7th ed	T1N0M0	BCLC:A	275	275	unknown		unknown
DO44748	LICA-FR		CHC208	male	deceased	relapse	local recurrence	80	80	81	188	C22.0	TNM 7th ed	T2N0M0	BCLC:A	513	513	unknown		unknown
DO44732	LICA-FR		CHC168	male	deceased	relapse	local recurrence	67	67	68	101	C22.0	TNM 7th ed	T2N0M0	BCLC:A	101	101	unknown		unknown
DO44730	LICA-FR		CHC164	male	deceased	relapse	local recurrence	65	65	68	1085	C22.0	TNM 7th ed	T3aN0M0	BCLC:B	1085	1085	unknown		unknown
DO44736	LICA-FR		CHC195	male	alive	complete remission		71	71	77	1826	C22.0	TNM 7th ed	T1N0M0	BCLC:A	1826	1826	unknown		unknown
DO44734	LICA-FR		CHC191	male	deceased	relapse	local recurrence	71	71	72	344	C22.0	TNM 7th ed	T3bN0M0	BCLC:C	344	344	unknown		unknown
DO44738	LICA-FR		CHC196	male	alive	complete remission		34	34	41	1826	C22.0	TNM 7th ed	T1N0M0	BCLC:A	1826	1826	unknown		unknown
DO44720	LICA-FR		CHC141	female	alive	complete remission		67	67	74	1826	C22.0	TNM 7th ed	T2N0M0	BCLC:A	1826	1826	unknown		unknown
DO44724	LICA-FR		CHC154	female	deceased	relapse	local recurrence	67	67	72	500	C22.0	TNM 7th ed	T1N0M0	BCLC:A	1490	1490	unknown		unknown
DO44722	LICA-FR		CHC152	male	deceased	complete remission		64	64	64	6	C22.0	TNM 7th ed	T3bN0M0	BCLC:C	6	6	unknown		unknown
DO44728	LICA-FR		CHC158	male	alive	complete remission		65	65	67	619	C22.0	TNM 7th ed	T2N0M0	BCLC:A	619	619	unknown		unknown
DO44726	LICA-FR		CHC155	male	alive	relapse	local recurrence	62	62	64	495	C22.0	TNM 7th ed	T1N0M0	BCLC:A	608	608	unknown		unknown
DO44710	LICA-FR		CHC123	male	deceased	relapse	local recurrence	42	42	43	137	C22.0	TNM 7th ed	T3bN0M0	BCLC:0	146	146	unknown		unknown
DO44714	LICA-FR		CHC129	female				62	62			C22.0						unknown		unknown
DO44712	LICA-FR		CHC126	female	alive	complete remission		68	68	75	1826	C22.0	TNM 7th ed	T1N0M0	BCLC:A	1826	1826	unknown		unknown
DO44718	LICA-FR		CHC137	male	alive	complete remission		71	71	78	1826	C22.0	TNM 7th ed	T1N0M0	BCLC:A	1826	1826	unknown		unknown
DO44716	LICA-FR		CHC130	male	alive	relapse	local recurrence	60	60	63	619	C22.0	TNM 7th ed	T1N0M0	BCLC:A	953	953	unknown		unknown
DO44702	LICA-FR		CHC1196	male	deceased	relapse	local recurrence	27	27	28	91	C22.0	TNM 7th ed	T2N0M0	BCLC:A	343	343	unknown		unknown
DO44700	LICA-FR		CHC1192	male	deceased	relapse	local recurrence	40	40	42	298	C22.0	TNM 7th ed	T2N0M0	BCLC:A	565	565	unknown		unknown
DO44706	LICA-FR		CHC1201	male	deceased	relapse	local recurrence	73	73	79	935	C22.0	TNM 7th ed	T1N0M0	BCLC:A	1826	1826	unknown		unknown
DO44704	LICA-FR		CHC1199	male	deceased	relapse	local recurrence	63	63	66	609	C22.0	TNM 7th ed	T3bN0M0	BCLC:C	1312	1312	unknown		unknown
DO44708	LICA-FR		CHC121	male				67	67			C22.0						unknown		unknown
DO44798	LICA-FR		CHC309	female				69	69			C22.0						unknown		unknown
DO44796	LICA-FR		CHC307	male	alive	complete remission		54	54	59	1826	C22.0	TNM 7th ed	T2N0M0	BCLC:A	1826	1826	unknown		unknown
DO44790	LICA-FR		CHC303	male	deceased	complete remission		74	74	74	13	C22.0	TNM 7th ed	T2N0M0	BCLC:A	13	13	unknown		unknown
DO44794	LICA-FR		CHC306	male				68	68			C22.0						unknown		unknown
DO44792	LICA-FR		CHC304	male				77	77			C22.0						unknown		unknown
DO44786	LICA-FR		CHC301	male	deceased	relapse	local recurrence	78	78	82	1344	C22.0	TNM 7th ed	T2N0M0	BCLC:B	1525	1525	unknown		unknown
DO44784	LICA-FR		CHC258	male	alive	complete remission		56	56	63	1826	C22.0	TNM 7th ed	T1N0M0	BCLC:A	1826	1826	unknown		unknown
DO44788	LICA-FR		CHC302	male				72	72			C22.0						unknown		unknown
DO44782	LICA-FR		CHC254	male	alive	relapse	local recurrence	62	62	64	255	C22.0	TNM 7th ed	T3bN0M0	BCLC:C	442	442	unknown		unknown
DO44780	LICA-FR		CHC253	male				67	67			C22.0						unknown		unknown
DO44776	LICA-FR		CHC250	male	alive	relapse	local recurrence	34	34	35	157	C22.0	TNM 7th ed	T3bN0M0	BCLC:C	157	157	unknown		unknown
DO44774	LICA-FR		CHC245	male	deceased	relapse	local recurrence	63	63	64	287	C22.0	TNM 7th ed	T1N0M0	BCLC:0	408	408	unknown		unknown
DO44778	LICA-FR		CHC252	male	alive	relapse	local recurrence	57	57	64	1018	C22.0	TNM 7th ed	T1N0M0	BCLC:0	1826	1826	unknown		unknown
DO44772	LICA-FR		CHC242	male	deceased	relapse	local recurrence	70	70	75	1482	C22.0	TNM 7th ed	T1N0M0	BCLC:A	1786	1786	unknown		unknown
DO44770	LICA-FR		CHC241	male	alive	complete remission		59	59	65	1826	C22.0	TNM 7th ed	T1N0M0	BCLC:A	1826	1826	unknown		unknown
DO44764	LICA-FR		CHC235	female	alive	complete remission		66	66	70	1399	C22.0	TNM 7th ed	T1N0M0	BCLC:A	1399	1399	unknown		unknown
DO44762	LICA-FR		CHC230	male	alive	complete remission		70	70	76	1826	C22.0	TNM 7th ed	T1N0M0	BCLC:A	1826	1826	unknown		unknown
DO44768	LICA-FR		CHC239	female	alive	complete remission		21	21	22	382	C22.0	TNM 7th ed	T2N0M0	BCLC:A	382	382	unknown		unknown
DO44766	LICA-FR		CHC237	female	alive	complete remission		26	26	27	335	C22.0	TNM 7th ed	T3aN0M0	BCLC:B	335	335	unknown		unknown
DO44760	LICA-FR		CHC229	female	deceased	complete remission		65	65	65	28	C22.0	TNM 7th ed	T2N0M0	BCLC:A	28	28	unknown		unknown
DO44632	LICA-FR		CHC014	male	deceased	relapse	local recurrence	30	30	30	92	C22.0	TNM 7th ed	T2N0M0	BCLC:A	159	159	unknown		unknown
DO44630	LICA-FR		CHC013	male	deceased	relapse	local recurrence	63	63	64	181	C22.0	TNM 7th ed	T2N0M0	BCLC:A	476	476	unknown		unknown
DO44636	LICA-FR		CHC028	male	deceased	relapse	local recurrence	64	64	69	1213	C22.0	TNM 7th ed	T2N0M0	BCLC:A	1826	1826	unknown		unknown
DO44634	LICA-FR		CHC018	female				35	35			C22.0						unknown		unknown
DO44638	LICA-FR		CHC031	male	deceased	relapse	local recurrence	67	67	69	477	C22.0	TNM 7th ed	T1N0M0	BCLC:0	781	781	unknown		unknown
DO44628	LICA-FR		CHC012	male	deceased	relapse	local recurrence	35	35	37	243	C22.0	TNM 7th ed	T2N0M0	BCLC:A	465	465	unknown		unknown
DO44627	LICA-FR		CHC008	female	deceased	relapse	local recurrence	74	74	74	47	C22.0	TNM 7th ed	T1N0M0	BCLC:0	215	215	unknown		unknown
DO44698	LICA-FR		CHC1190	female	alive	relapse	local recurrence	68	68	74	836	C22.0	TNM 7th ed	T2N0M0	BCLC:A	1826	1826	unknown		unknown
DO44696	LICA-FR		CHC1185	male				53	53			C22.0						unknown		unknown
DO44690	LICA-FR		CHC115	male	deceased	relapse	local recurrence	59	59	65	725	C22.0	TNM 7th ed	T2N0M0	BCLC:A	1826	1826	unknown		unknown
DO44694	LICA-FR		CHC1162	male	deceased	relapse	local recurrence	60	60	69	84	C22.0	TNM 7th ed	T3aN0M0	BCLC:A	1826	1826	unknown		unknown
DO44692	LICA-FR		CHC1154	male	alive	complete remission		44	44	56	1826	C22.0	TNM 7th ed	T3bN0M0	BCLC:A	1826	1826	unknown		unknown
DO44688	LICA-FR		CHC1146	male	deceased	relapse	local recurrence	60	60	61	487	C22.0	TNM 7th ed	T3bN0M0	BCLC:C	547	547	unknown		unknown
DO44686	LICA-FR		CHC1069	male	alive	complete remission		78	78	78	85	C22.0	TNM 7th ed	T2N0M0	BCLC:A	85	85	unknown		unknown
DO44680	LICA-FR		CHC1061	female				79	79			C22.0						unknown		unknown
DO44684	LICA-FR		CHC1065	male	deceased	relapse	local recurrence	77	77	83	1210	C22.0	TNM 7th ed	T3bN0M0	BCLC:C	1826	1826	unknown		unknown
DO44682	LICA-FR		CHC1062	male	alive	complete remission		65	65	68	1103	C22.0	TNM 7th ed	T2N0M0	BCLC:A	1103	1103	unknown		unknown
DO44676	LICA-FR		CHC1055	male				68	68			C22.0						unknown		unknown
DO44674	LICA-FR		CHC1053	male				74	74			C22.0						unknown		unknown
DO44678	LICA-FR		CHC1060	male	alive	complete remission		66	66	69	876	C22.0	TNM 7th ed	T1N0M0	BCLC:A	876	876	unknown		unknown
DO44672	LICA-FR		CHC1052	male				75	75			C22.0						unknown		unknown
DO44670	LICA-FR		CHC1044	male	alive	complete remission		78	78	81	1013	C22.0	TNM 7th ed	T2N0M0	BCLC:0	1013	1013	unknown		unknown
DO44666	LICA-FR		CHC1040	male				73	73			C22.0						unknown		unknown
DO44664	LICA-FR		CHC1035	male	alive	relapse	local recurrence	68	68	71	321	C22.0	TNM 7th ed	T1N0M0	BCLC:A	923	923	unknown		unknown
DO44668	LICA-FR		CHC1041	male				69	69			C22.0						unknown		unknown
DO44662	LICA-FR		CHC100	male	alive	complete remission		68	68	75	1826	C22.0	TNM 7th ed	T2N0M0	BCLC:A	1826	1826	unknown		unknown
DO44660	LICA-FR		CHC097	male	deceased	relapse	local recurrence	56	56	59	398	C22.0	TNM 7th ed	T3aN0M0	BCLC:B	1125	1125	unknown		unknown
DO44654	LICA-FR		CHC059	male	deceased	relapse	local recurrence	40	40	42	491	C22.0	TNM 7th ed	T3bN0M0	BCLC:C	491	491	unknown		unknown
DO44652	LICA-FR		CHC051	female				69	69			C22.0						unknown		unknown
DO44658	LICA-FR		CHC081	female	deceased	complete remission		76	76	76	32	C22.0	TNM 7th ed	T1N0M0	BCLC:A	32	32	unknown		unknown
DO44656	LICA-FR		CHC060	male	deceased	relapse	local recurrence	68	68	70	643	C22.0	TNM 7th ed	T3bN0M0	BCLC:C	829	829	unknown		unknown
DO44650	LICA-FR		CHC046	female	alive	complete remission		61	61	62	387	C22.0	TNM 7th ed	T3bN0M0	BCLC:C	387	387	unknown		unknown
DO44644	LICA-FR		CHC034	male	deceased	relapse	local recurrence	56	56	57	368	C22.0	TNM 7th ed	T2N0M0	BCLC:A	704	704	unknown		unknown
DO44642	LICA-FR		CHC033	male	deceased	relapse	local recurrence	38	38	39	139	C22.0	TNM 7th ed	T3bN0M0	BCLC:C	200	200	unknown		unknown
DO44648	LICA-FR		CHC043	male	alive	complete remission		56	56	60	1745	C22.0	TNM 7th ed	T1N0M0	BCLC:A	1745	1745	unknown		unknown
DO44646	LICA-FR		CHC037	male	alive	complete remission		51	51	56	1826	C22.0	TNM 7th ed	T1N0M0	BCLC:A	1826	1826	unknown		unknown
DO44640	LICA-FR		CHC032	male	deceased	complete remission		59	59	60	27	C22.0	TNM 7th ed	T2N0M0	BCLC:B	27	27	unknown		unknown
DO44870	LICA-FR		CHC983	male	deceased	relapse	local recurrence	54	54	56	202	C22.0	TNM 7th ed	T2N0M0	BCLC:B	818	818	unknown		unknown
DO44864	LICA-FR		CHC909	male				70	70			C22.0						unknown		unknown
DO44862	LICA-FR		CHC891	female				73	73			C22.0						unknown		unknown
DO44868	LICA-FR		CHC961	male				57	57			C22.0						unknown		unknown
DO44860	LICA-FR		CHC882	male	alive	complete remission		55	55	57	866	C22.0	TNM 7th ed	T1N0M0	BCLC:A	866	866	unknown		unknown
DO44852	LICA-FR		CHC725	male	alive	complete remission		60	60	70	1826	C22.0	TNM 7th ed	T1N0M0	BCLC:A	1826	1826	unknown		unknown
DO44850	LICA-FR		CHC715	male				56	56			C22.0	TNM 7th ed	T2N0M0	BCLC:B			unknown		unknown
DO44856	LICA-FR		CHC794	male				73	73			C22.0						unknown		unknown
DO44854	LICA-FR		CHC793	male				61	61			C22.0						unknown		unknown
DO44858	LICA-FR		CHC798	male	deceased	complete remission		73	73	74	481	C22.0	TNM 7th ed	T1N0M0	BCLC:A	481	481	unknown		unknown
DO44842	LICA-FR		CHC445	male	deceased	complete remission		55	55	56	396	C22.0	TNM 7th ed	T2N0M0	BCLC:0	396	396	unknown		unknown
DO44840	LICA-FR		CHC441	male	alive	relapse	local recurrence	77	77	78	172	C22.0	TNM 7th ed	T1N0M0	BCLC:A	234	234	unknown		unknown
DO44846	LICA-FR		CHC609	male				60	60			C22.0						unknown		unknown
DO44848	LICA-FR		CHC614	male				61	61			C22.0						unknown		unknown
DO44830	LICA-FR		CHC430	male	deceased	relapse	local recurrence	50	50	51	255	C22.0	TNM 7th ed	T3aN0M0	BCLC:B	255	255	unknown		unknown
DO44834	LICA-FR		CHC434	female	alive	relapse	local recurrence	71	71	77	786	C22.0	TNM 7th ed	T1N0M0	BCLC:A	1826	1826	unknown		unknown
DO44832	LICA-FR	PCAWG	CHC433	male				70	70			C22.0						unknown		unknown
DO44838	LICA-FR		CHC438	male	deceased	complete remission		76	76	76	27	C22.0	TNM 7th ed	T2N0M0	BCLC:A	27	27	unknown		unknown
DO44836	LICA-FR		CHC437	male	deceased	relapse	local recurrence	59	59	61	398	C22.0	TNM 7th ed	T1N0M0	BCLC:A	740	740	unknown		unknown
DO44820	LICA-FR		CHC398	male				50	50			C22.0	TNM 7th ed	T2N0M0	BCLC:0			unknown		unknown
DO44824	LICA-FR		CHC402	male	deceased	relapse	local recurrence	28	28	28	332	C22.0	TNM 7th ed	T3aN0M0	BCLC:B	507	507	unknown		unknown
DO44822	LICA-FR		CHC399	male	alive	relapse	local recurrence	67	67	70	804	C22.0	TNM 7th ed	T2N0M0	BCLC:A	1119	1119	unknown		unknown
DO44828	LICA-FR	PCAWG	CHC429	female	alive	relapse	local recurrence	65	65	70	690	C22.0	TNM 7th ed	T2N0M0	BCLC:A	1826	1826	unknown		unknown
DO44826	LICA-FR		CHC405	male	alive	complete remission		77	77	80	1164	C22.0	TNM 7th ed	T1N0M0	BCLC:A	1164	1164	unknown		unknown
DO44812	LICA-FR		CHC327	male				63	63			C22.0						unknown		unknown
DO44810	LICA-FR		CHC326	male	alive	complete remission		49	49	53	1520	C22.0	TNM 7th ed	T2N0M0	BCLC:A	1520	1520	unknown		unknown
DO44816	LICA-FR		CHC335	male	alive	complete remission		68	68	73	1776	C22.0	TNM 7th ed	T2N0M0	BCLC:A	1776	1776	unknown		unknown
DO44814	LICA-FR		CHC333	male	deceased	complete remission		73	73	73	3	C22.0	TNM 7th ed	T1N0M0	BCLC:A	3	3	unknown		unknown
DO44818	LICA-FR		CHC339	female	deceased	relapse	local recurrence	26	26	31	1041	C22.0	TNM 7th ed	T3bN0M0	BCLC:C	1703	1703	unknown		unknown
DO44802	LICA-FR		CHC314	male				71	71			C22.0						unknown		unknown
DO44800	LICA-FR		CHC313	female				43	43			C22.0						unknown		unknown
DO44806	LICA-FR	PCAWG	CHC320	male	deceased	complete remission		65	65	65	44	C22.0	TNM 7th ed	T2N0M0	BCLC:B	44	44	unknown		unknown
DO44804	LICA-FR		CHC317	female	deceased	relapse	local recurrence	69	69	72	994	C22.0	TNM 7th ed	T2N0M0	BCLC:A	994	994	unknown		unknown
DO44808	LICA-FR	PCAWG	CHC322	male				74	74			C22.0						unknown		unknown
DO22830	LICA-FR		CHC917	male	alive	complete remission		83	83	86	1353	C22.0	TNM 7th ed	T1N0M0	BCLC:A	1353	1353	unknown		unknown
DO22802	LICA-FR		CHC1915	male				43	43			C22.0	TNM 7th ed	T1N0M0	BCLC:A			unknown		unknown
DO22804	LICA-FR		CHC361	female	deceased	relapse	local recurrence	67	67	78	1386	C22.0	TNM 7th ed	T1N0M0	BCLC:A	1826	1826	unknown		unknown
DO22812	LICA-FR		CHC469	female	deceased	relapse	local recurrence	32	32	34	380	C22.0	TNM 7th ed	T3bN0M0	BCLC:C	697	697	unknown		unknown
DO22810	LICA-FR		CHC464	female	alive	complete remission		42	42	48	1826	C22.0	TNM 7th ed	T1N0M0	BCLC:A	1826	1826	unknown		unknown
DO222357	LICA-FR		CHC442	female	alive	complete remission		27	27	28	412	C22.0				412	412	unknown		unknown
DO222358	LICA-FR		CHC906	female	deceased	relapse	local recurrence	50	50	53	503	C22.0				1239	1239	unknown		unknown
DO222355	LICA-FR		CHC334	female	alive	relapse	local recurrence	24	24	34	748	C22.0				1826	1826	unknown		unknown
DO222354	LICA-FR		CHC255	female	deceased	relapse	local recurrence	39	39	43	456	C22.0				1729	1729	unknown		unknown

## Sheet: ICGC-JP
icgc_donor_id	project_code	study_donor_involved_in	submitted_donor_id	donor_sex	donor_vital_status	disease_status_last_followup	donor_relapse_type	donor_age_at_diagnosis	donor_age_at_enrollment	donor_age_at_last_followup	donor_relapse_interval	donor_diagnosis_icd10	donor_tumour_staging_system_at_diagnosis	donor_tumour_stage_at_diagnosis	donor_tumour_stage_at_diagnosis_supplemental	donor_survival_time	donor_interval_of_last_followup	prior_malignancy	cancer_type_prior_malignancy	cancer_history_first_degree_relative
DO50855	LIRI-JP	PCAWG	RK326	male	alive			47	47			C22	TNM by LCSGJ	2		570		no		no
DO50857	LIRI-JP	PCAWG	RK337	male	alive			72	72			C22	TNM by LCSGJ	2		210		no		yes
DO50859	LIRI-JP	PCAWG	RK338	male	alive			77	77			C22	TNM by LCSGJ	2		180		yes	C25	no
DO50850	LIRI-JP	PCAWG	RK305	male	alive			74	74			C22	TNM by LCSGJ	3		720		no		no
DO50851	LIRI-JP	PCAWG	RK306	male	alive			80	80			C22	TNM by LCSGJ	2		540		no		no
DO50842	LIRI-JP	PCAWG	RK287	female	alive			75	75			C22	TNM by LCSGJ	4		300		no		no
DO50844	LIRI-JP	PCAWG	RK289	male	alive			75	75			C22	TNM by LCSGJ	4		300		no		yes
DO50845	LIRI-JP	PCAWG	RK297	male	alive			72	72			C22	TNM by LCSGJ	3		210		no		no
DO50848	LIRI-JP	PCAWG	RK304	male	alive			74	74			C22	TNM by LCSGJ	3		480		no		no
DO50840	LIRI-JP	PCAWG	RK285	male	alive			49	49			C22	TNM by LCSGJ	2		330		no		no
DO50839	LIRI-JP	PCAWG	RK284	female	alive			47	47			C22	TNM by LCSGJ	3		330		no		yes
DO50831	LIRI-JP	PCAWG	RK278	male	alive			52	52			C22	TNM by LCSGJ	2		510		no		no
DO50832	LIRI-JP	PCAWG	RK280	male	alive			73	73			C22	TNM by LCSGJ	3		90		no		yes
DO50834	LIRI-JP	PCAWG	RK282	male	alive			72	72			C22	TNM by LCSGJ	2		540		no		unknown
DO50837	LIRI-JP	PCAWG	RK283	female	alive			53	53			C22	TNM by LCSGJ	1		480		no		no
DO50829	LIRI-JP	PCAWG	RK277	male	alive			78	78			C22	TNM by LCSGJ	3		570		no		yes
DO50820	LIRI-JP	PCAWG	RK267	female	alive			77	77			C22	TNM by LCSGJ	3		510		no		no
DO50822	LIRI-JP	PCAWG	RK268	male	alive			66	66			C22	TNM by LCSGJ	2		510		no		no
DO50825	LIRI-JP	PCAWG	RK270	male	alive			70	70			C22	TNM by LCSGJ	2		390		no		no
DO50827	LIRI-JP	PCAWG	RK275	female	alive			48	48			C22	TNM by LCSGJ	2		480		no		no
DO50817	LIRI-JP	PCAWG	RK264	male	alive			75	75			C22	TNM by LCSGJ	2		390		no		no
DO50818	LIRI-JP	PCAWG	RK265	male	alive			65	65			C22	TNM by LCSGJ	2		510		no		no
DO50819	LIRI-JP	PCAWG	RK266	female	alive			72	72			C22	TNM by LCSGJ	2		510		no		no
DO50811	LIRI-JP	PCAWG	RK259	male	alive			62	62			C22	TNM by LCSGJ	1		450		no		no
DO50813	LIRI-JP	PCAWG	RK260	male	alive			56	56			C22	TNM by LCSGJ	2		420		no		no
DO50814	LIRI-JP	PCAWG	RK261	male	alive			83	83			C22	TNM by LCSGJ	3		420		no		no
DO50815	LIRI-JP	PCAWG	RK262	male	alive			62	62			C22	TNM by LCSGJ	3		150		no		no
DO50816	LIRI-JP	PCAWG	RK263	male	alive			63	63			C22	TNM by LCSGJ	2		390		no		no
DO50806	LIRI-JP	PCAWG	RK254	male	alive			70	70			C22	TNM by LCSGJ	4		540		no		yes
DO50807	LIRI-JP	PCAWG	RK256	male	alive			67	67			C22	TNM by LCSGJ	1		540		no		yes
DO50808	LIRI-JP	PCAWG	RK257	male	alive			68	68			C22	TNM by LCSGJ	2		570		yes	C67	no
DO50809	LIRI-JP	PCAWG	RK258	male	deceased			56	56			C22	TNM by LCSGJ	3		720		no		yes
DO50800	LIRI-JP	PCAWG	RK237	male	alive			74	74			C22	TNM by LCSGJ	2		510		no		yes
DO50802	LIRI-JP	PCAWG	RK241	male	alive			49	49			C22	TNM by LCSGJ	2		930		yes	C18	yes
DO50803	LIRI-JP	PCAWG	RK243	female	alive			62	62			C22	TNM by LCSGJ	1		540		yes	C18	no
DO50804	LIRI-JP	PCAWG	RK244	male	alive			81	81			C22	TNM by LCSGJ	2		720		yes	C66	unknown
DO50805	LIRI-JP	PCAWG	RK245	male	alive			72	72			C22	TNM by LCSGJ	2		690		yes	C61	no
DO50798	LIRI-JP	PCAWG	RK235	male	deceased			77	77			C22	TNM by LCSGJ	3		30		no		no
DO50799	LIRI-JP	PCAWG	RK236	female	alive			66	66			C22	TNM by LCSGJ	2		540		no		yes
DO50791	LIRI-JP	PCAWG	RK232	female	deceased			79	79			C22	TNM by LCSGJ	1		480		no		yes
DO50793	LIRI-JP	PCAWG	RK233	male	alive			76	76			C22	TNM by LCSGJ	4		540		yes	C16	yes
DO50796	LIRI-JP	PCAWG	RK234	male	alive			69	69			C22	TNM by LCSGJ	2		540		no		no
DO50787	LIRI-JP	PCAWG	RK229	male	alive			63	63			C22	TNM by LCSGJ	3		480		no		no
DO50789	LIRI-JP	PCAWG	RK230	female	alive			73	73			C22	TNM by LCSGJ	2		570		yes	C16	yes
DO50780	LIRI-JP	PCAWG	RK225	male	deceased			70	70			C22	TNM by LCSGJ	4		660		no		no
DO50783	LIRI-JP	PCAWG	RK227	male	alive			62	62			C22	TNM by LCSGJ	3		480		yes	C66	no
DO50785	LIRI-JP	PCAWG	RK228	male	deceased			37	37			C22	TNM by LCSGJ	4		90		no		no
DO50776	LIRI-JP	PCAWG	RK223	male	alive			75	75			C22	TNM by LCSGJ	1		690		yes	C61	no
DO50778	LIRI-JP	PCAWG	RK224	male	alive			60	60			C22	TNM by LCSGJ	4		630		no		yes
DO50772	LIRI-JP	PCAWG	RK221	male	alive			70	70			C22	TNM by LCSGJ	1		660		no		no
DO50774	LIRI-JP	PCAWG	RK222	female	alive			68	68			C22	TNM by LCSGJ	2		720		no		no
DO45287	LIRI-JP	PCAWG	RK269	male	alive			74	74			C22	TNM by LCSGJ	1		390		yes	C20	no
DO45289	LIRI-JP	PCAWG	RK272	female	alive			78	78			C22	TNM by LCSGJ	3		360		no		no
DO45283	LIRI-JP	PCAWG	RK208	male	alive			60	60			C22	TNM by LCSGJ	3		510		yes	C15	unknown
DO45285	LIRI-JP	PCAWG	RK226	male	alive			59	59			C22	TNM by LCSGJ	3		480		no		no
DO45291	LIRI-JP	PCAWG	RK279	male	alive			69	69			C22	TNM by LCSGJ	3		570		no		no
DO45279	LIRI-JP	PCAWG	RK194	male	alive			67	67			C22	TNM by LCSGJ	3		1290		no		no
DO45275	LIRI-JP		RK182	male	deceased			65	65			C22	TNM by LCSGJ	3		10		no		no
DO45277	LIRI-JP	PCAWG	RK184	male	alive			64	64			C22	TNM by LCSGJ	3		600		no		no
DO45273	LIRI-JP	PCAWG	RK180	male	alive			62	62			C22	TNM by LCSGJ	2		480		no		no
DO45281	LIRI-JP	PCAWG	RK204	male	alive			83	83			C22	TNM by LCSGJ	4		750		no		no
DO45269	LIRI-JP	PCAWG	RK177	male	alive			59	59			C22	TNM by LCSGJ	3		750		no		no
DO45265	LIRI-JP	PCAWG	RK167	male	alive			73	73			C22	TNM by LCSGJ	3		1020		no		no
DO45267	LIRI-JP	PCAWG	RK170	male	deceased			73	73			C22	TNM by LCSGJ	3		570		no		yes
DO45261	LIRI-JP	PCAWG	RK165	male	alive			74	74			C22	TNM by LCSGJ	3		990		no		no
DO45263	LIRI-JP	PCAWG	RK166	male	deceased			67	67			C22	TNM by LCSGJ	3		270		no		no
DO45257	LIRI-JP	PCAWG	RK157	male	alive			46	46			C22	TNM by LCSGJ	3		810		no		no
DO45259	LIRI-JP	PCAWG	RK159	male	alive			65	65			C22	TNM by LCSGJ	3		330		no		no
DO45253	LIRI-JP	PCAWG	RK147	male	alive			50	50			C22	TNM by LCSGJ	2		870		no		yes
DO45255	LIRI-JP	PCAWG	RK148	male	alive			81	81			C22	TNM by LCSGJ	3		720		no		yes
DO45251	LIRI-JP	PCAWG	RK146	female	alive			57	57			C22	TNM by LCSGJ	2		900		no		no
DO45247	LIRI-JP	PCAWG	RK141	female	alive			31	31			C22	TNM by LCSGJ	2		210		no		no
DO45249	LIRI-JP	PCAWG	RK142	male	alive			57	57			C22	TNM by LCSGJ	1		630		no		yes
DO45243	LIRI-JP	PCAWG	RK137	female	alive			74	74			C22	TNM by LCSGJ	3		930		no		no
DO45245	LIRI-JP	PCAWG	RK138	female	deceased			75	75			C22	TNM by LCSGJ	2		240		yes	C16	unknown
DO45241	LIRI-JP	PCAWG	RK133	male	alive			49	49			C22	TNM by LCSGJ	1		1080		no		yes
DO45239	LIRI-JP	PCAWG	RK130	male	alive			42	42			C22	TNM by LCSGJ	2		870		no		no
DO45235	LIRI-JP	PCAWG	RK115	female	alive			68	68			C22	TNM by LCSGJ	1		900		no		no
DO45237	LIRI-JP	PCAWG	RK126	male	alive			58	58			C22	TNM by LCSGJ	2		900		no		no
DO45231	LIRI-JP	PCAWG	RK109	male	alive			84	84			C22	TNM by LCSGJ	2		930		no		no
DO45233	LIRI-JP	PCAWG	RK112	male	alive			83	83			C22	TNM by LCSGJ	3		900		yes	C67	no
DO45229	LIRI-JP	PCAWG	RK108	male	alive			74	74			C22	TNM by LCSGJ	1		990		no		no
DO45225	LIRI-JP	PCAWG	RK106	male	alive			69	69			C22	TNM by LCSGJ	1		1050		no		no
DO45227	LIRI-JP	PCAWG	RK107	female	alive			57	57			C22	TNM by LCSGJ	2		1020		no		no
DO45221	LIRI-JP	PCAWG	RK100	female	deceased			75	75			C22	TNM by LCSGJ	4		390		no		no
DO45223	LIRI-JP	PCAWG	RK103	male	alive			67	67			C22	TNM by LCSGJ	4		1020		no		no
DO45217	LIRI-JP	PCAWG	RK098	female	deceased			69	69			C22	TNM by LCSGJ	3		270		no		no
DO45219	LIRI-JP	PCAWG	RK099	male	alive			78	78			C22	TNM by LCSGJ	2		1080		no		no
DO45213	LIRI-JP	PCAWG	RK092	male	alive			58	58			C22	TNM by LCSGJ	1		1200		no		yes
DO45215	LIRI-JP	PCAWG	RK096	male	alive			65	65			C22	TNM by LCSGJ	2		1170		no		yes
DO45211	LIRI-JP	PCAWG	RK091	male	alive			76	76			C22	TNM by LCSGJ	3		240		no		no
DO45297	LIRI-JP	PCAWG	RK307	female	deceased			61	61			C22	TNM by LCSGJ	4		1260		no		no
DO45299	LIRI-JP	PCAWG	RK308	female	alive			70	70			C22	TNM by LCSGJ	1		1440		no		unknown
DO45293	LIRI-JP	PCAWG	RK298	male	alive			68	68			C22	TNM by LCSGJ	3		450		no		no
DO45295	LIRI-JP	PCAWG	RK303	male	alive			76	76			C22	TNM by LCSGJ	2		300		no		no
DO45207	LIRI-JP	PCAWG	RK086	male	alive			68	68			C22	TNM by LCSGJ	1		1050		no		no
DO45209	LIRI-JP	PCAWG	RK089	male	alive			70	70			C22	TNM by LCSGJ	4		1350		no		yes
DO45203	LIRI-JP	PCAWG	RK083	female	alive			71	71			C22	TNM by LCSGJ	2		1170		no		no
DO45205	LIRI-JP	PCAWG	RK084	female	deceased			67	67			C22	TNM by LCSGJ	2		90		no		yes
DO45201	LIRI-JP	PCAWG	RK082	male	alive			49	49			C22	TNM by LCSGJ	1		900		no		yes
DO45169	LIRI-JP	PCAWG	RK056	male	alive			74	74			C22	TNM by LCSGJ	3		1350		no		no
DO45165	LIRI-JP	PCAWG	RK054	male	alive			75	75			C22	TNM by LCSGJ	2		690		no		yes
DO45167	LIRI-JP	PCAWG	RK055	male	deceased			67	67			C22	TNM by LCSGJ	2		1440		no		yes
DO45161	LIRI-JP	PCAWG	RK051	male	deceased			74	74			C22	TNM by LCSGJ	2		540		yes	C18	no
DO45163	LIRI-JP	PCAWG	RK052	male	alive			76	76			C22	TNM by LCSGJ	2		960		no		yes
DO45171	LIRI-JP	PCAWG	RK058	male	alive			56	56			C22	TNM by LCSGJ	3		600		no		unknown
DO45159	LIRI-JP	PCAWG	RK050	male	alive			65	65			C22	TNM by LCSGJ	3		1470		no		no
DO45155	LIRI-JP	PCAWG	RK048	male	alive			69	69			C22	TNM by LCSGJ	2		2160		yes	C67	yes
DO45157	LIRI-JP	PCAWG	RK049	male	alive			62	62			C22	TNM by LCSGJ	2		1980		no		no
DO45151	LIRI-JP	PCAWG	RK046	male	alive			64	64			C22	TNM by LCSGJ	3		1230		no		no
DO45153	LIRI-JP	PCAWG	RK047	female	alive			77	77			C22	TNM by LCSGJ	2		1380		no		no
DO45147	LIRI-JP	PCAWG	RK042	male	deceased			57	57			C22	TNM by LCSGJ	2		720		no		yes
DO45149	LIRI-JP	PCAWG	RK044	female	alive			70	70			C22	TNM by LCSGJ	2		1260		no		no
DO45143	LIRI-JP	PCAWG	RK037	male	alive			69	69			C22	TNM by LCSGJ	3		1290		no		no
DO45145	LIRI-JP	PCAWG	RK041	male	deceased			78	78			C22	TNM by LCSGJ	3		60		no		no
DO45141	LIRI-JP	PCAWG	RK036	male	alive			73	73			C22	TNM by LCSGJ	2		1320		no		no
DO45137	LIRI-JP	PCAWG	RK034	male	alive			38	38			C22	TNM by LCSGJ	1		1320		no		yes
DO45139	LIRI-JP	PCAWG	RK035	male	alive			63	63			C22	TNM by LCSGJ	3		1320		no		yes
DO45133	LIRI-JP	PCAWG	RK032	male	deceased			64	64			C22	TNM by LCSGJ	3		660		no		yes
DO45135	LIRI-JP	PCAWG	RK033	male	alive			77	77			C22	TNM by LCSGJ	1		1410		no		yes
DO45131	LIRI-JP	PCAWG	RK031	male	deceased			53	53			C22	TNM by LCSGJ	4		360		no		yes
DO45129	LIRI-JP	PCAWG	RK029	male	alive			61	61			C22	TNM by LCSGJ	3		1470		no		yes
DO45125	LIRI-JP	PCAWG	RK026	male	alive			58	58			C22	TNM by LCSGJ	3		1680		no		no
DO45127	LIRI-JP	PCAWG	RK027	male	deceased			73	73			C22	TNM by LCSGJ	3		420		no		no
DO45121	LIRI-JP	PCAWG	RK024	male	alive			61	61			C22	TNM by LCSGJ	3		1530		no		no
DO45123	LIRI-JP	PCAWG	RK025	female	deceased			78	78			C22	TNM by LCSGJ	2		570		no		yes
DO45119	LIRI-JP	PCAWG	RK023	male	deceased			74	74			C22	TNM by LCSGJ	3		510		yes	C15	yes
DO45115	LIRI-JP	PCAWG	RK021	male	alive			81	81			C22	TNM by LCSGJ	2		840		yes	C67	no
DO45117	LIRI-JP	PCAWG	RK022	female	deceased			73	73			C22	TNM by LCSGJ	2		1110		no		yes
DO45111	LIRI-JP	PCAWG	RK019	male	alive			74	74			C22	TNM by LCSGJ	2		1590		no		yes
DO45113	LIRI-JP	PCAWG	RK020	male	alive			58	58			C22	TNM by LCSGJ	3		1560		no		yes
DO45107	LIRI-JP	PCAWG	RK016	female	alive			63	63			C22	TNM by LCSGJ	2		1710		no		yes
DO45109	LIRI-JP	PCAWG	RK018	male	alive			63	63			C22	TNM by LCSGJ	2		1590		no		no
DO45103	LIRI-JP	PCAWG	RK014	male	alive			47	47			C22	TNM by LCSGJ	3		450		no		yes
DO45105	LIRI-JP	PCAWG	RK015	male	alive			61	61			C22	TNM by LCSGJ	1		1680		no		unknown
DO45101	LIRI-JP	PCAWG	RK012	male	alive			63	63			C22	TNM by LCSGJ	2		1680		no		unknown
DO45199	LIRI-JP	PCAWG	RK080	female	alive			86	86			C22	TNM by LCSGJ	2		1350		no		no
DO45195	LIRI-JP	PCAWG	RK073	male	alive			62	62			C22	TNM by LCSGJ	1		390		no		no
DO45197	LIRI-JP	PCAWG	RK079	male	alive			51	51			C22	TNM by LCSGJ	2		1170		no		no
DO45187	LIRI-JP	PCAWG	RK068	female	alive			32	32			C22	TNM by LCSGJ	1		1260		no		unknown
DO45189	LIRI-JP	PCAWG	RK069	female	alive			85	85			C22	TNM by LCSGJ	2		1200		no		yes
DO45183	LIRI-JP	PCAWG	RK066	female	deceased			72	72			C22	TNM by LCSGJ	2		570		no		no
DO45185	LIRI-JP	PCAWG	RK067	male	alive			89	89			C22	TNM by LCSGJ	2		600		no		unknown
DO45191	LIRI-JP	PCAWG	RK071	female	alive			61	61			C22	TNM by LCSGJ	2		1200		no		yes
DO45193	LIRI-JP	PCAWG	RK072	female	deceased			68	68			C22	TNM by LCSGJ	4		120		yes	C16	no
DO45177	LIRI-JP	PCAWG	RK063	female	alive			81	81			C22	TNM by LCSGJ	3		1260		no		no
DO45179	LIRI-JP	PCAWG	RK064	female	alive			78	78			C22	TNM by LCSGJ	2		600		no		yes
DO45173	LIRI-JP	PCAWG	RK061	male	alive			63	63			C22	TNM by LCSGJ	3		1170		no		yes
DO45175	LIRI-JP	PCAWG	RK062	male	alive			74	74			C22	TNM by LCSGJ	2		1140		no		yes
DO45181	LIRI-JP	PCAWG	RK065	female	alive			84	84			C22	TNM by LCSGJ	2		1200		no		yes
DO227643	LIRI-JP		RK039	male	alive			79	79			C22	TNM by LCSGJ	2		1260		no		no
DO45305	LIRI-JP	PCAWG	RK312	male	alive			66	66			C22	TNM by LCSGJ	4		300		no		no
DO45307	LIRI-JP	PCAWG	RK316	female	deceased			54	54			C22	TNM by LCSGJ	4		240		no		no
DO45301	LIRI-JP	PCAWG	RK309	male	deceased			56	56			C22	TNM by LCSGJ	2		1440		no		unknown
DO45303	LIRI-JP	PCAWG	RK310	female	alive			62	62			C22	TNM by LCSGJ	3		990		no		unknown
DO45309	LIRI-JP	PCAWG	RK317	male	deceased			73	73			C22	TNM by LCSGJ	3		30		no		no
DO227801	LIRI-JP		RK255	female	alive			77	77			C22	TNM by LCSGJ	1		660		yes	C67	no
DO48761	LIRI-JP	PCAWG	RK220	male	alive			55	55			C22	TNM by LCSGJ	2		870		no		yes
DO48760	LIRI-JP	PCAWG	RK219	female	alive			70	70			C22	TNM by LCSGJ	2		690		no		no
DO48759	LIRI-JP	PCAWG	RK217	male	alive			73	73			C22	TNM by LCSGJ	3		720		no		no
DO48757	LIRI-JP	PCAWG	RK216	female	alive			68	68			C22	TNM by LCSGJ	3		480		no		no
DO48751	LIRI-JP	PCAWG	RK214	male	deceased			68	68			C22	TNM by LCSGJ	2		480		no		no
DO48753	LIRI-JP	PCAWG	RK215	male	alive			55	55			C22	TNM by LCSGJ	3		510		no		no
DO48747	LIRI-JP	PCAWG	RK213	male	alive			62	62			C22	TNM by LCSGJ	3		540		no		no
DO48746	LIRI-JP	PCAWG	RK212	male	alive			76	76			C22	TNM by LCSGJ	3		570		no		no
DO48741	LIRI-JP	PCAWG	RK207	male	alive			64	64			C22	TNM by LCSGJ	3		240		no		yes
DO48743	LIRI-JP	PCAWG	RK211	female	alive			69	69			C22	TNM by LCSGJ	2		570		yes	C50, C05	no
DO48742	LIRI-JP	PCAWG	RK210	male	alive			76	76			C22	TNM by LCSGJ	2		600		no		no
DO48738	LIRI-JP	PCAWG	RK206	male	alive			83	83			C22	TNM by LCSGJ	4		780		no		no
DO48737	LIRI-JP	PCAWG	RK205	male	alive			52	52			C22	TNM by LCSGJ	1		720		no		no
DO48733	LIRI-JP	PCAWG	RK201	male	alive			72	72			C22	TNM by LCSGJ	2		600		no		yes
DO48736	LIRI-JP	PCAWG	RK202	female	alive			76	76			C22	TNM by LCSGJ	1		600		no		yes
DO48730	LIRI-JP	PCAWG	RK199	female	alive			73	73			C22	TNM by LCSGJ	2		630		no		no
DO48732	LIRI-JP	PCAWG	RK200	male	alive			73	73			C22	TNM by LCSGJ	3		630		no		yes
DO48727	LIRI-JP	PCAWG	RK197	female	deceased			81	81			C22	TNM by LCSGJ	2		390		no		no
DO48728	LIRI-JP	PCAWG	RK198	female	alive			74	74			C22	TNM by LCSGJ	2		150		yes	D11	yes
DO48723	LIRI-JP	PCAWG	RK195	male	alive			73	73			C22	TNM by LCSGJ	1		600		no		yes
DO48725	LIRI-JP	PCAWG	RK196	male	alive			66	66			C22	TNM by LCSGJ	1		780		no		no
DO48721	LIRI-JP	PCAWG	RK193	female	alive			58	58			C22	TNM by LCSGJ	1		900		no		yes
DO48720	LIRI-JP	PCAWG	RK191	female	alive			62	62			C22	TNM by LCSGJ	2		570		no		no
DO48716	LIRI-JP	PCAWG	RK187	male	alive			71	71			C22	TNM by LCSGJ	2		720		no		yes
DO48715	LIRI-JP	PCAWG	RK186	female	deceased			58	58			C22	TNM by LCSGJ	2		690		no		no
DO48717	LIRI-JP	PCAWG	RK188	male	deceased			54	54			C22	TNM by LCSGJ	4		180		no		yes
DO48712	LIRI-JP	PCAWG	RK185	male	alive			50	50			C22	TNM by LCSGJ	2		810		no		yes
DO48719	LIRI-JP	PCAWG	RK190	male	alive			80	80			C22	TNM by LCSGJ	2		690		no		no
DO48704	LIRI-JP	PCAWG	RK178	female	alive			68	68			C22	TNM by LCSGJ	3		750		no		yes
DO48706	LIRI-JP	PCAWG	RK181	male	alive			72	72			C22	TNM by LCSGJ	2		870		no		no
DO48701	LIRI-JP	PCAWG	RK175	male	alive			78	78			C22	TNM by LCSGJ	2		780		no		yes
DO48700	LIRI-JP	PCAWG	RK171	female	alive			78	78			C22	TNM by LCSGJ	2		810		no		yes
DO48703	LIRI-JP	PCAWG	RK176	male	alive			64	64			C22	TNM by LCSGJ	2		750		no		yes
DO48709	LIRI-JP	PCAWG	RK183	male	alive			74	74			C22	TNM by LCSGJ	1		900		no		no
DO48679	LIRI-JP	PCAWG	RK081	male	alive			72	72			C22	TNM by LCSGJ	2		1200		no		no
DO48674	LIRI-JP	PCAWG	RK070	male	alive			80	80			C22	TNM by LCSGJ	2		1260		no		no
DO48677	LIRI-JP	PCAWG	RK077	male	alive			58	58			C22	TNM by LCSGJ	3		1140		no		unknown
DO48672	LIRI-JP	PCAWG	RK059	male	alive			81	81			C22	TNM by LCSGJ	2		450		yes	C34	yes
DO48697	LIRI-JP	PCAWG	RK163	female	deceased			64	64			C22	TNM by LCSGJ	2		810		no		no
DO48693	LIRI-JP	PCAWG	RK149	male	alive			71	71			C22	TNM by LCSGJ	2		900		no		yes
DO48692	LIRI-JP	PCAWG	RK144	female	alive			77	77			C22	TNM by LCSGJ	3		900		no		no
DO48695	LIRI-JP	PCAWG	RK162	male	alive			77	77			C22	TNM by LCSGJ	2		720		yes	C34	no
DO48694	LIRI-JP	PCAWG	RK154	male	alive			71	71			C22	TNM by LCSGJ	2		840		no		yes
DO48689	LIRI-JP	PCAWG	RK136	male	alive			63	63			C22	TNM by LCSGJ	2		900		no		no
DO48686	LIRI-JP	PCAWG	RK122	male	alive			75	75			C22	TNM by LCSGJ	3		990		no		yes
DO48687	LIRI-JP	PCAWG	RK123	female	alive			73	73			C22	TNM by LCSGJ	2		120		no		no
DO48682	LIRI-JP	PCAWG	RK119	female	deceased			72	72			C22	TNM by LCSGJ	3		120		yes	C25	yes
DO48681	LIRI-JP	PCAWG	RK111	male	alive			57	57			C22	TNM by LCSGJ	2		900		no		no
DO48684	LIRI-JP	PCAWG	RK121	female	deceased			71	71			C22	TNM by LCSGJ	3		810		yes	C50	no
DO48691	LIRI-JP	PCAWG	RK139	male	alive			71	71			C22	TNM by LCSGJ	2		900		no	C67	no
DO45099	LIRI-JP	PCAWG	RK010	male	alive			46	46			C22	TNM by LCSGJ	3		1590		no		unknown
DO45095	LIRI-JP	PCAWG	RK005	male	alive			66	66			C22	TNM by LCSGJ	2		1620		no		no
DO45096	LIRI-JP	PCAWG	RK006	male	deceased			69	69			C22	TNM by LCSGJ	2		1290		no		no
DO45097	LIRI-JP	PCAWG	RK007	male	alive			69	69			C22	TNM by LCSGJ	3		1620		no		no
DO45091	LIRI-JP	PCAWG	RK001	male	deceased			56	56			C22	TNM by LCSGJ	2		1320		no		no
DO45092	LIRI-JP	PCAWG	RK002	male	deceased			62	62			C22	TNM by LCSGJ	4		1200		no		no
DO45093	LIRI-JP	PCAWG	RK003	male	deceased			71	71			C22	TNM by LCSGJ	2		720		no		no
DO45094	LIRI-JP	PCAWG	RK004	male	alive			76	76			C22	TNM by LCSGJ	3		1650		no		no
DO23552	LIRI-JP	PCAWG	RK172	female	alive			80	80			C22	TNM by LCSGJ	1		810		no		no
DO23551	LIRI-JP	PCAWG	RK169	male	deceased			73	73			C22	TNM by LCSGJ	3		150		no		no
DO23550	LIRI-JP	PCAWG	RK164	male	alive			69	69			C22	TNM by LCSGJ	1		990		no		no
DO23539	LIRI-JP	PCAWG	RK134	male	alive			77	77			C22	TNM by LCSGJ	1		1110		yes	C62	unknown
DO23538	LIRI-JP	PCAWG	RK131	male	alive			67	67			C22	TNM by LCSGJ	2		450		no		no
DO23537	LIRI-JP	PCAWG	RK128	male	deceased			79	79			C22	TNM by LCSGJ	2		900		yes	C16	no
DO23536	LIRI-JP	PCAWG	RK125	male	alive			56	56			C22	TNM by LCSGJ	2		930		no		no
DO23535	LIRI-JP	PCAWG	RK124	male	alive			67	67			C22	TNM by LCSGJ	1		960		no		no
DO23534	LIRI-JP	PCAWG	RK120	male	alive			60	60			C22	TNM by LCSGJ	2		840		no		no
DO23533	LIRI-JP	PCAWG	RK118	male	alive			61	61			C22	TNM by LCSGJ	2		900		no		no
DO23532	LIRI-JP	PCAWG	RK117	female	alive			71	71			C22	TNM by LCSGJ	1		960		no		yes
DO23531	LIRI-JP	PCAWG	RK116	female	alive			78	78			C22	TNM by LCSGJ	3		900		no		no
DO23530	LIRI-JP	PCAWG	RK113	male	deceased			53	53			C22	TNM by LCSGJ	4		180		no		no
DO23549	LIRI-JP	PCAWG	RK156	male	alive			74	74			C22	TNM by LCSGJ	3		990		no		no
DO23548	LIRI-JP	PCAWG	RK155	female	alive			78	78			C22	TNM by LCSGJ	1		840		no		yes
DO23547	LIRI-JP	PCAWG	RK153	male	alive			74	74			C22	TNM by LCSGJ	1		1020		no		no
DO23546	LIRI-JP	PCAWG	RK152	male	alive			63	63			C22	TNM by LCSGJ	2		1050		no		unknown
DO23545	LIRI-JP	PCAWG	RK151	male	deceased			67	67			C22	TNM by LCSGJ	2		570		yes	C16	no
DO23544	LIRI-JP	PCAWG	RK150	male	alive			67	67			C22	TNM by LCSGJ	2		960		no		no
DO23543	LIRI-JP	PCAWG	RK145	male	alive			63	63			C22	TNM by LCSGJ	2		1020		no		no
DO23542	LIRI-JP	PCAWG	RK143	male	alive			66	66			C22	TNM by LCSGJ	3		960		no		yes
DO23541	LIRI-JP	PCAWG	RK140	male	alive			65	65			C22	TNM by LCSGJ	2		930		no		no
DO23540	LIRI-JP	PCAWG	RK135	male	alive			73	73			C22	TNM by LCSGJ	1		750		no		no
DO23517	LIRI-JP	PCAWG	RK075	male	alive			62	62			C22	TNM by LCSGJ	2		1200		no		yes
DO23516	LIRI-JP	PCAWG	RK074	male	deceased			69	69			C22	TNM by LCSGJ	3		20		no		no
DO23515	LIRI-JP	PCAWG	RK060	male	alive			71	71			C22	TNM by LCSGJ	2		1230		yes	C16	yes
DO23514	LIRI-JP	PCAWG	RK057	male	alive			64	64			C22	TNM by LCSGJ	2		1290		no		no
DO23513	LIRI-JP	PCAWG	RK053	male	alive			76	76			C22	TNM by LCSGJ	3		1200		no		no
DO23512	LIRI-JP	PCAWG	RK043	male	alive			60	60			C22	TNM by LCSGJ	1		1260		no		no
DO23511	LIRI-JP	PCAWG	RK040	female	deceased			83	83			C22	TNM by LCSGJ	3		180		no		no
DO23510	LIRI-JP	PCAWG	RK038	female	alive			80	80			C22	TNM by LCSGJ	2		870		no		yes
DO23519	LIRI-JP	PCAWG	RK085	male	alive			65	65			C22	TNM by LCSGJ	3		630		no		no
DO23518	LIRI-JP	PCAWG	RK076	male	alive			67	67			C22	TNM by LCSGJ	2		1320		no		no
DO23528	LIRI-JP	PCAWG	RK105	female	alive			45	45			C22	TNM by LCSGJ	2		1020		no		yes
DO23527	LIRI-JP	PCAWG	RK104	male	alive			72	72			C22	TNM by LCSGJ	1		1050		no		no
DO23526	LIRI-JP	PCAWG	RK102	male	alive			66	66			C22	TNM by LCSGJ	3		1050		no		no
DO23525	LIRI-JP	PCAWG	RK101	male	alive			71	71			C22	TNM by LCSGJ	4		1050		no		no
DO23524	LIRI-JP	PCAWG	RK095	female	alive			71	71			C22	TNM by LCSGJ	2		1050		yes	C50	no
DO23523	LIRI-JP	PCAWG	RK093	male	alive			52	52			C22	TNM by LCSGJ	3		1080		no		yes
DO23522	LIRI-JP	PCAWG	RK090	female	alive			82	82			C22	TNM by LCSGJ	1		1320		no		no
DO23521	LIRI-JP	PCAWG	RK088	male	alive			63	63			C22	TNM by LCSGJ	3		1110		no		no
DO23520	LIRI-JP	PCAWG	RK087	male	alive			59	59			C22	TNM by LCSGJ	4		1410		no		unknown
DO23529	LIRI-JP	PCAWG	RK110	male	alive			72	72			C22	TNM by LCSGJ	4		930		no		no
DO23509	LIRI-JP	PCAWG	RK030	male	deceased			60	60			C22	TNM by LCSGJ	3		780		no		no
DO23508	LIRI-JP	PCAWG	RK028	female	alive			79	79			C22	TNM by LCSGJ	2		390		no		no
